# Supplementary material for: Confirmation bias leads to overestimation of losses of woody plant foliage to insect herbivores in tropical regions
Source: PubMed Central journal article supplement (PMC4277485; doi:10.7717/peerj.709), 2014-12-23
Supplement: peerj-02-709-s001.pdf [file peerj-02-709-s001.pdf]

**Appendix S1.** Published data on foliar losses of woody plants to insects in Brazil.

| No | Continent                      | Latitude | Longitude | Altitude | Habitat                                   | Family          | Plant species              |
|----|--------------------------------|----------|-----------|----------|-------------------------------------------|-----------------|----------------------------|
| 1  | 28-45 km N of Manaus           | 2.77 S   | 60.00 W   | 80       | Secondary forest                          | .               | COMMUNITY-WIDE             |
| 2  | 28-45 km N of Manaus           | 2.77 S   | 60.00 W   | 80       | Primary rain forest                       | .               | COMMUNITY-WIDE             |
| 3  | 70 km N Manaus                 | 2.42 S   | 59.80 W   | 100      | Primary rain forest                       | Melastomataceae | <i>Maieta guianensis</i>   |
| 4  | 70 km N Manaus                 | 2.50 S   | 60.00 W   | 100      | Primary rain forest                       | Melastomataceae | <i>Tococa bullifera</i>    |
| 5  | Belo Horizonte                 | 19.87 S  | 43.97 W   | 840      | Cerrado                                   | Bignoniaceae    | <i>Tabebuia ochracea</i>   |
| 6  | Belo Horizonte                 | 19.87 S  | 43.97 W   | 840      | Cerrado                                   | Bignoniaceae    | <i>Tabebuia aurea</i>      |
| 7  | Belo Horizonte                 | 19.87 S  | 43.97 W   | 840      | Mesic forest                              | Bignoniaceae    | <i>Tabebuia ochracea</i>   |
| 8  | Belo Horizonte                 | 19.87 S  | 43.97 W   | 840      | Cerrado                                   | Bignoniaceae    | <i>Tabebuia ochracea</i>   |
| 9  | Belo Horizonte                 | 19.87 S  | 43.97 W   | 840      | Cerrado                                   | Bignoniaceae    | <i>Tabebuia ochracea</i>   |
| 10 | Belo Horizonte                 | 19.87 S  | 43.97 W   | 840      | Cerrado                                   | Bignoniaceae    | <i>Tabebuia aurea</i>      |
| 11 | Belo Horizonte                 | 19.87 S  | 43.97 W   | 840      | Cerrado                                   | Bignoniaceae    | <i>Tabebuia aurea</i>      |
| 12 | Cerrado Pe-de-Gigante          | 21.64 S  | 47.64 W   | 650      | Cerrado                                   | Apiaceae        | <i>Didymopanax vinosum</i> |
| 13 | Cerrado Pe-de-Gigante          | 21.64 S  | 47.64 W   | 640      | Grassland with scattered trees and shrubs | Apiaceae        | <i>Didymopanax vinosum</i> |
| 14 | Cerrado Pe-de-Gigante          | 21.64 S  | 47.62 W   | 680      | Tall woodland (cerrado)                   | Apiaceae        | <i>Didymopanax vinosum</i> |
| 15 | Cerrado Pe-de-Gigante          | 21.64 S  | 47.64 W   | 650      | Cerrado                                   | Apiaceae        | <i>Didymopanax vinosum</i> |
| 16 | Cerrado Pe-de-Gigante          | 21.64 S  | 47.64 W   | 640      | Grassland with scattered trees and shrubs | Apiaceae        | <i>Didymopanax vinosum</i> |
| 17 | Cerrado Pe-de-Gigante          | 21.64 S  | 47.62 W   | 680      | Tall woodland (cerrado)                   | Apiaceae        | <i>Didymopanax vinosum</i> |
| 18 | Cerrado research station       | 21.75 S  | 45.01 W   | 960      | Cerrado                                   | Vochysiaceae    | <i>Qualea grandiflora</i>  |
| 19 | Clube de Caca e Pesca Itororo  | 18.98 S  | 48.30 W   | 740      | Cerrado                                   | Ochnaceae       | <i>Ouratea spectabilis</i> |
| 20 | Cuiaba                         | 15.60 S  | 56.10 W   | 170      | Cerrado                                   | Vochysiaceae    | <i>Vochysia rufa</i>       |
| 21 | Cuiaba                         | 15.60 S  | 56.10 W   | 170      | Cerrado                                   | Dilleniaceae    | <i>Curatella americana</i> |
| 22 | Cuiaba                         | 15.60 S  | 56.10 W   | 170      | Cerrado                                   | Vochysiaceae    | <i>Vochysia rufa</i>       |
| 23 | Cuiaba                         | 15.60 S  | 56.10 W   | 170      | Cerrado                                   | Dilleniaceae    | <i>Curatella americana</i> |
| 24 | Ecological Station Pirapitinga | 18.34 S  | 45.31 W   | 570      | Cerrado                                   | Vochysiaceae    | <i>Qualea parviflora</i>   |
| 25 | Ecological Station Pirapitinga | 18.34 S  | 45.31 W   | 570      | Cerrado                                   | Vochysiaceae    | <i>Qualea parviflora</i>   |
| 26 | Ecological Station Pirapitinga | 18.34 S  | 45.31 W   | 570      | Cerrado                                   | Vochysiaceae    | <i>Qualea parviflora</i>   |
| 27 | Ecological Station Pirapitinga | 18.34 S  | 45.31 W   | 570      | Cerrado                                   | Fabaceae        | <i>Bauhinia brevipes</i>   |
| 28 | Ecological Station Pirapitinga | 18.34 S  | 45.31 W   | 570      | Cerrado                                   | Vochysiaceae    | <i>Qualea parviflora</i>   |

|    |                               |         |         |     |                                |                 |                                 |
|----|-------------------------------|---------|---------|-----|--------------------------------|-----------------|---------------------------------|
| 29 | Fazenda Agua Limpa            | 15.93 S | 44.92 W | 600 | Cerrado                        | Erythroxylaceae | <i>Erythroxylum tortuosum</i>   |
| 30 | Fazenda Agua Limpa            | 15.93 S | 44.92 W | 600 | Cerrado                        | Malpighiaceae   | <i>Byrsonima verbascifolia</i>  |
| 31 | Fazenda Agua Limpa            | 15.93 S | 44.92 W | 600 | Cerrado                        | Euphorbiaceae   | <i>Maprounea guianensis</i>     |
| 32 | Fazenda Agua Limpa            | 15.93 S | 44.92 W | 600 | Cerrado                        | Erythroxylaceae | <i>Erythroxylum campestre</i>   |
| 33 | Fazenda Agua Limpa            | 15.93 S | 44.92 W | 600 | Cerrado                        | Clusiaceae      | <i>Kielmeyera coriacea</i>      |
| 34 | Fazenda Agua Limpa            | 15.93 S | 44.92 W | 600 | Cerrado                        | Clusiaceae      | <i>Kielmeyera variabilis</i>    |
| 35 | Fazenda Agua Limpa            | 15.93 S | 44.92 W | 600 | Cerrado                        | Rubiaceae       | <i>Palicourea rigida</i>        |
| 36 | Fazenda Agua Limpa            | 15.93 S | 44.92 W | 600 | Cerrado                        | Malpighiaceae   | <i>Peixotoa goyana</i>          |
| 37 | Fazenda Agua Limpa            | 15.93 S | 44.92 W | 600 | Cerrado                        | Lamiaceae       | <i>Hyptis saxatilis</i>         |
| 38 | Fazenda Agua Limpa            | 15.93 S | 44.92 W | 600 | Cerrado                        | Malpighiaceae   | <i>Byrsonima coccolobifolia</i> |
| 39 | Fazenda Agua Limpa            | 15.93 S | 44.92 W | 600 | Cerrado                        | Erythroxylaceae | <i>Erythroxylum deciduum</i>    |
| 40 | Fazenda Agua Limpa            | 15.93 S | 44.92 W | 600 | Cerrado                        | Vochysiaceae    | <i>Qualea grandiflora</i>       |
| 41 | Fazenda Agua Limpa            | 15.93 S | 44.92 W | 600 | Cerrado                        | Euphorbiaceae   | <i>Croton goyazensis</i>        |
| 42 | Fazenda Agua Limpa            | 15.93 S | 44.92 W | 600 | Cerrado                        | Apocynaceae     | <i>Aspidosperma tomentosum</i>  |
| 43 | Fazenda Agua Limpa            | 15.93 S | 44.92 W | 600 | Cerrado                        | Malpighiaceae   | <i>Byrsonima crassa</i>         |
| 44 | Fazenda Agua Limpa            | 15.93 S | 44.92 W | 600 | Cerrado                        | Rubiaceae       | <i>Chomelia ribesioides</i>     |
| 45 | Fazenda Agua Limpa            | 15.93 S | 44.92 W | 600 | Cerrado                        | Malvaceae       | <i>Pavonia rosa-campestris</i>  |
| 46 | Fazenda Agua Limpa            | 15.93 S | 44.92 W | 600 | Cerrado                        | Rubiaceae       | <i>Sabicea brasiliensis</i>     |
| 47 | Fazenda Agua Limpa            | 15.93 S | 44.92 W | 600 | Cerrado                        | Vochysiaceae    | <i>Qualea parviflora</i>        |
| 48 | Fazenda Agua Limpa            | 15.93 S | 44.92 W | 600 | Cerrado                        | Erythroxylaceae | <i>Erythroxylum suberosum</i>   |
| 49 | Fazenda Jatoba                | 13.88 S | 45.70 W | 760 | Cerrado                        | Melastomataceae | <i>Tococa guainanensis</i>      |
| 50 | Gloria's Farm                 | 18.95 S | 48.20 W | 920 | Cerrado                        | Solanaceae      | <i>Solanum lycocarpum</i>       |
| 51 | Maraca Island                 | 3.42 N  | 61.67 W | 150 | Forests                        | Poaceae         | <i>Pradosia surinamensis</i>    |
| 52 | Maraca Island                 | 3.42 N  | 61.67 W | 150 | Forests                        | Sapotaceae      | <i>Ecclinusa guianensis</i>     |
| 53 | Maraca Island                 | 3.42 N  | 61.67 W | 150 | Forests                        | Fabaceae        | <i>Peltogyne gracilipes</i>     |
| 54 | Mata Seca State Park          | 14.88 S | 43.99 W | 460 | Seasonally dry tropical forest | Bignoniaceae    | <i>Handroanthus spongiosus</i>  |
| 55 | Mata Seca State Park          | 14.88 S | 43.99 W | 460 | Seasonally dry tropical forest | Bignoniaceae    | <i>Handroanthus spongiosus</i>  |
| 56 | Municipality of Montes Claros | 16.75 S | 43.92 W | 880 | Savanna                        | Caryocaraceae   | <i>Caryocar brasiliense</i>     |
| 57 | Pantanal do rio Miranda       | 21.47 S | 56.15 W | 290 | Pantanal                       | Bignoniaceae    | <i>Tabebuia aurea</i>           |
| 58 | Pantanal do rio Miranda       | 21.47 S | 56.15 W | 290 | Pantanal                       | Bignoniaceae    | <i>Tabebuia aurea</i>           |
| 59 | Pantanal do rio Miranda       | 21.47 S | 56.15 W | 290 | Pantanal                       | Bignoniaceae    | <i>Tabebuia aurea</i>           |

|    |                                |         |         |     |                                   |                 |                                    |
|----|--------------------------------|---------|---------|-----|-----------------------------------|-----------------|------------------------------------|
| 60 | Parnamirim                     | 8.08 S  | 39.57 W | 230 | Dry tropical forest               | Euphorbiaceae   | <i>Cnidoscolus quercifolius</i>    |
| 61 | Piloes Valley                  | 23.90 S | 46.50 W | 210 | .                                 | Melastomataceae | <i>Tibouchina pulchra</i>          |
| 62 | Piloes Valley                  | 23.90 S | 46.50 W | 210 | .                                 | Melastomataceae | <i>Tibouchina pulchra</i>          |
| 63 | Rio Pandeiros                  | 15.60 S | 44.67 W | 620 | Cerrado = savanna                 | .               | COMMUNITY-WIDE                     |
| 64 | Rio Pandeiros                  | 15.60 S | 44.67 W | 620 | Dry forests                       | .               | COMMUNITY-WIDE                     |
| 65 | Saint-Hilaire Forest           | 16.60 S | 49.26 W | 800 | Mesic semi-deciduous forest       | Styracaceae     | <i>Styrax pohlii</i>               |
| 66 | Sao Carlos                     | 21.98 S | 47.86 W | 850 | Cerrado                           | Verbenaceae     | <i>Aegiphila lhotzkiana</i>        |
| 67 | Sao Carlos                     | 21.98 S | 47.86 W | 850 | Cerrado                           | Ebenaceae       | <i>Diospyros hispida</i>           |
| 68 | Sao Carlos                     | 21.98 S | 47.86 W | 850 | Cerrado                           | Fabaceae        | <i>Stryphnodendron adstringens</i> |
| 69 | Sao Carlos                     | 21.98 S | 47.86 W | 850 | Cerrado                           | Styracaceae     | <i>Styrax ferrugineus</i>          |
| 70 | Sao Carlos                     | 21.98 S | 47.86 W | 850 | Cerrado                           | Bombacaceae     | <i>Eriotheca gracilipes</i>        |
| 71 | Sao Carlos                     | 21.98 S | 47.86 W | 850 | Cerrado                           | Asteraceae      | <i>Vernonia</i> sp.                |
| 72 | Sao Carlos                     | 21.98 S | 47.86 W | 850 | Cerrado                           | Fabaceae        | <i>Stryphnodendron polyphyllum</i> |
| 73 | Sao Carlos                     | 21.98 S | 47.86 W | 850 | Cerrado                           | Asteraceae      | <i>Piptocarpha rotundifolia</i>    |
| 74 | Sao Carlos                     | 21.98 S | 47.86 W | 850 | Cerrado                           | Rubiaceae       | <i>Rourea induta</i>               |
| 75 | Sao Carlos                     | 21.98 S | 47.86 W | 850 | Cerrado                           | Bignoniaceae    | <i>Tabebuia ochracea</i>           |
| 76 | Sao Carlos                     | 21.98 S | 47.86 W | 850 | Cerrado                           | Connaraceae     | <i>Connarus suberosus</i>          |
| 77 | Saraca-Taquera National Forest | 1.40 S  | 56.27 W | 60  | Evergreen equatorial moist forest | Anacardiaceae   | <i>Tapirira guianensis</i>         |
| 78 | Saraca-Taquera National Forest | 1.40 S  | 56.27 W | 60  | Evergreen equatorial moist forest | Anacardiaceae   | <i>Tapirira guianensis</i>         |
| 79 | Uberlandia                     | 18.95 S | 48.20 W | 950 | Cerrado                           | Vochysiaceae    | <i>Qualea multiflora</i>           |
| 80 | Uberlandia                     | 18.95 S | 48.20 W | 950 | Cerrado                           | Lythraceae      | <i>Lafoensia pacari</i>            |
| 81 | Uberlandia                     | 18.95 S | 48.20 W | 950 | Cerrado                           | Vochysiaceae    | <i>Qualea multiflora</i>           |
| 82 | Mata Seca State Park           | 14.88 S | 43.99 W | 460 | Seasonally dry tropical forest    | .               | COMMUNITY-WIDE                     |
| 83 | Mata Seca State Park           | 14.88 S | 43.99 W | 460 | Seasonally dry tropical forest    | .               | COMMUNITY-WIDE                     |
| 84 | Mata Seca State Park           | 14.88 S | 43.99 W | 460 | Seasonally dry tropical forest    | .               | COMMUNITY-WIDE                     |

|     |                                   |         |         |     |                 |                 |                               |
|-----|-----------------------------------|---------|---------|-----|-----------------|-----------------|-------------------------------|
| 85  | Municipality of Montes Claros     | 16.75 S | 43.92 W | 880 | Cerrado         | Caryocaraceae   | <i>Caryocar brasiliense</i>   |
| 86  | Municipality of Montes Claros     | 16.75 S | 43.92 W | 880 | Cerrado         | Caryocaraceae   | <i>Caryocar brasiliense</i>   |
| 87  | Municipality of Montes Claros     | 16.75 S | 43.92 W | 880 | Cerrado         | Caryocaraceae   | <i>Caryocar brasiliense</i>   |
| 88  | Municipality of Montes Claros     | 16.75 S | 43.92 W | 880 | Cerrado         | Caryocaraceae   | <i>Caryocar brasiliense</i>   |
| 89  | Municipality of Montes Claros     | 16.75 S | 43.92 W | 880 | Cerrado         | Caryocaraceae   | <i>Caryocar brasiliense</i>   |
| 90  | Parque Estadual Intervales        | 24.27 S | 48.40 W | 850 | Atlantic forest | Piperaceae      | <i>Piper hispidum</i>         |
| 91  | Serra do Cipo                     | 19.25 S | 43.58 W | 100 | Cerrado         | Solanaceae      | <i>Solanum lycocarpum</i>     |
| 92  | Parque Municipal da Lagoa do Peri | 27.72 S | 48.54 W | 3   | Restinga        | Myrtaceae       | <i>Gomigesia palustris</i>    |
| 93  | Parque Municipal da Lagoa do Peri | 27.72 S | 48.54 W | 3   | Restinga        | Myrtaceae       | <i>Gomigesia palustris</i>    |
| 94  | Serra do Cipo                     | 19.25 S | 43.58 W | 100 | Cerrado         |                 | <i>Chamaecrista semaphora</i> |
| 95  | Emas National Park                | 18.64 S | 52.91 W | 800 | Cerrado         | .               | COMMUNITY-WIDE                |
| 96  | Fazenda Remanso                   | 14.80 S | 52.64 W | 350 | Forest          | Fabaceae        | <i>Peltogyne conferti</i>     |
| 97  | Fazenda Remanso                   | 14.80 S | 52.64 W | 350 | Cerrado         | Fabaceae        | <i>Peltogyne conferti</i>     |
| 98  | Duas Bocas                        | 20.27 S | 40.67 W | 800 | .               | Euphorbiaceae   | <i>Croton</i> sp.             |
| 99  | Duas Bocas                        | 20.27 S | 40.67 W | 800 | .               | Solanaceae      | <i>Solanum hexandrum</i>      |
| 100 | EFLEX                             | 19.33 S | 44.33 W | 740 | Savanna         | Clusiaceae      | <i>Kielmeyera coriacea</i>    |
| 101 | BDFFP site                        | 2.42 S  | 59.84 W | 120 | Rain forest     | Melastomataceae | <i>Maieta guianensis</i>      |
| 102 | BDFFP site                        | 2.42 S  | 59.84 W | 120 | Rain forest     | Melastomataceae | <i>Tococa bullifera</i>       |

Continued.

| No | Herbivores | No of sites | No of trees per site | No of leaves | Leaves damaged (%) | Leaf area consumed (%) | Reference            | Data extracted from | Comments              |
|----|------------|-------------|----------------------|--------------|--------------------|------------------------|----------------------|---------------------|-----------------------|
| 1  | all        | 1           | 60                   | 300          | 72.0               | 2.60                   | Vasconcelos 1999     | Text p. 618, Tab. 1 |                       |
| 2  | all        | 1           | 60                   | 300          | 74.1               | 2.90                   | Vasconcelos 1999     | Text p. 618, Tab. 1 |                       |
| 3  | all        | 1           | 15                   | 120          | .                  | 11.20                  | Vasconcelos 1991     | Fig. 2              |                       |
| 4  | all        | 1           | 20                   | 120          | .                  | 28.70                  | Bruna et al. 2004    | Fig. 2b             | With ants             |
| 5  | miners     | 3           | 44                   | 1672         | .                  | 1.60                   | Ribeiro & Brown 1999 | Fig. 1              | Leaf cohorts averaged |

|    |         |   |     |      |      |       |                                    |             |                        |
|----|---------|---|-----|------|------|-------|------------------------------------|-------------|------------------------|
| 6  | miners  | 3 | 27  | 837  | .    | 2.50  | Ribeiro & Brown 1999               | Fig. 1      | Leaf cohorts averaged  |
| 7  | all     | 1 | 1   | 283  | .    | 4.05  | Ribeiro et al. 1994                | Text p. 305 | Years averaged         |
| 8  | chewers | 3 | 44  | 1672 | .    | 10.80 | Ribeiro & Brown 1999               | Fig. 1      | Leaf cohorts averaged  |
| 9  | all     | 3 | 44  | 1672 | .    | 12.40 | Ribeiro & Brown 1999               | Fig. 1      | Leaf cohorts averaged  |
| 10 | chewers | 3 | 27  | 837  | .    | 17.50 | Ribeiro & Brown 1999               | Fig. 1      | Leaf cohorts averaged  |
| 11 | all     | 3 | 27  | 837  | .    | 20.00 | Ribeiro & Brown 1999               | Fig. 1      | Leaf cohorts averaged  |
| 12 | chewers | 1 | 10  | .    | 11.6 | 0.04  | Varanda & Pais 2006                | Tab. 1      |                        |
| 13 | chewers | 1 | 10  | .    | 5.4  | 0.19  | Varanda & Pais 2006                | Tab. 1      |                        |
| 14 | chewers | 1 | 10  | .    | 34.5 | 0.74  | Varanda & Pais 2006                | Tab. 1      |                        |
| 15 | all     | 1 | 10  | .    | .    | 1.32  | Varanda & Pais 2006                | Tab. 1      |                        |
| 16 | all     | 1 | 10  | .    | .    | 7.33  | Varanda & Pais 2006                | Tab. 1      |                        |
| 17 | all     | 1 | 10  | .    | .    | 8.49  | Varanda & Pais 2006                | Tab. 1      |                        |
| 18 | all     | 1 | 15  | 150  | .    | 19.17 | Costa <i>et al.</i> 1992           | Fig. 1      | May, control trees     |
| 19 | all     | 1 | 11  | 99   | .    | 4.20  | Byk & Del-Claro 2010               | Fig. 2      | Control                |
| 20 | all     | 1 | 3   | 193  | 55.5 | 2.92  | Nascimento <i>et al.</i> 1990      | Fig. 3      | 4 dates averaged       |
| 21 | all     | 1 | 3   | 132  | 78.8 | 4.55  | Nascimento <i>et al.</i> 1990      | Fig. 3      | 4 dates averaged       |
| 22 | all     | 1 | 3   | 47   | 76.0 | 10.50 | Nascimento <i>et al.</i> 1990      | Fig. 4      | Last census - May 1986 |
| 23 | all     | 1 | 3   | 30   | 94.0 | 18.25 | Nascimento <i>et al.</i> 1990      | Fig. 3      | Last census - May 1986 |
| 24 | all     | 3 | 15  | 60   | .    | 5.71  | Goncalves-Alvim <i>et al.</i> 2010 | Tab. 1      | Three sites averaged   |
| 25 | all     | 1 | 30  | 600  | 77.1 | 6.05  | Goncalves-Alvim <i>et al.</i> 2004 | Tab. 5      |                        |
| 26 | all     | 3 | 30  | 600  | .    | 8.07  | Goncalves-Alvim <i>et al.</i> 2011 | Fig. 1      | Mature leaves          |
| 27 | all     | 1 | 170 | 3400 | 30.3 | 13.70 | Cornelissen & Fernandes 2001       | Fig. 2      |                        |
| 28 | gallers | 1 | 30  | 600  | 0.8  | .     | Goncalves-Alvim <i>et al.</i> 2004 | Tab. 5      |                        |
| 29 | all     | 1 | 5   | 25   | .    | 3.00  | Marquis <i>et al.</i> 2001         | Fig. 3a     |                        |
| 30 | all     | 1 | 5   | 25   | .    | 3.70  | Marquis <i>et al.</i> 2001         | Fig. 3a     |                        |
| 31 | all     | 1 | 5   | 25   | .    | 4.10  | Marquis <i>et al.</i> 2001         | Fig. 3a     |                        |
| 32 | all     | 1 | 5   | 25   | .    | 4.40  | Marquis <i>et al.</i> 2001         | Fig. 3a     |                        |
| 33 | all     | 1 | 5   | 25   | .    | 4.70  | Marquis <i>et al.</i> 2001         | Fig. 3a     |                        |
| 34 | all     | 1 | 5   | 25   | .    | 4.70  | Marquis <i>et al.</i> 2001         | Fig. 3a     |                        |
| 35 | all     | 1 | 5   | 25   | .    | 4.90  | Marquis <i>et al.</i> 2001         | Fig. 3a     |                        |
| 36 | all     | 1 | 5   | 25   | .    | 5.10  | Marquis <i>et al.</i> 2001         | Fig. 3a     |                        |
| 37 | all     | 1 | 5   | 25   | .    | 5.20  | Marquis <i>et al.</i> 2001         | Fig. 3a     |                        |
| 38 | all     | 1 | 5   | 25   | .    | 6.80  | Marquis <i>et al.</i> 2001         | Fig. 3a     |                        |

|    |         |   |    |      |      |       |                             |              |                                    |
|----|---------|---|----|------|------|-------|-----------------------------|--------------|------------------------------------|
| 39 | all     | 1 | 5  | 25   | .    | 7.00  | Marquis <i>et al.</i> 2001  | Fig. 3a      |                                    |
| 40 | all     | 1 | 5  | 25   | .    | 7.00  | Marquis <i>et al.</i> 2001  | Fig. 3a      |                                    |
| 41 | all     | 1 | 5  | 25   | .    | 7.70  | Marquis <i>et al.</i> 2001  | Fig. 3a      |                                    |
| 42 | all     | 1 | 5  | 25   | .    | 8.80  | Marquis <i>et al.</i> 2001  | Fig. 3a      |                                    |
| 43 | all     | 1 | 5  | 25   | .    | 9.00  | Marquis <i>et al.</i> 2001  | Fig. 3a      |                                    |
| 44 | all     | 1 | 5  | 25   | .    | 9.20  | Marquis <i>et al.</i> 2001  | Fig. 3a      |                                    |
| 45 | all     | 1 | 5  | 25   | .    | 10.3  | Marquis <i>et al.</i> 2001  | Fig. 3a      |                                    |
| 46 | all     | 1 | 5  | 25   | .    | 11.80 | Marquis <i>et al.</i> 2001  | Fig. 3a      |                                    |
| 47 | all     | 1 | 5  | 25   | .    | 12.30 | Marquis <i>et al.</i> 2001  | Fig. 3a      |                                    |
| 48 | all     | 1 | 5  | 25   | .    | 13.00 | Marquis <i>et al.</i> 2001  | Fig. 3a      |                                    |
| 49 | chewers | 1 | 30 | 30   | .    | 5.93  | Bizerri & Vieira 2002       | Fig. 3       | Old leaves                         |
| 50 | all     | 1 | 24 | 480  | .    | 8.55  | Moreira & Del-Claro 2005    | Fig. 3       | Control plants; two years averaged |
| 51 | all     | 2 |    |      | .    | 6.1   | Nascimento & Proctor 2001   | Tab. 1       |                                    |
| 52 | all     | 2 | .  | .    | .    | 11.9  | Nascimento & Proctor 2001   | Tab. 1       |                                    |
| 53 | all     | 2 | .  | .    | .    | 14.0  | Nascimento & Proctor 2001   | Tab. 1       |                                    |
| 54 | all     | 1 | 5  | 45   | .    | 7.40  | Silva <i>et al.</i> 2012    | Fig. 5a      | April, late successional forest    |
| 55 | chewers | 1 | 20 | 100  | .    | 12.80 | Oliveira <i>et al.</i> 2012 | Fig. 3       | April data                         |
| 56 | all     | 1 | 25 | 400  | .    | 0.95  | Leite <i>et al.</i> 2012    | Tab. 2       | Autumn                             |
| 57 | miners  | 1 | 15 | 465  | .    | 2.30  | Ribeiro & Brown 1999        | Fig. 1       | Leaf cohorts averaged              |
| 58 | chewers | 1 | 15 | 465  | .    | 8.30  | Ribeiro & Brown 1999        | Fig. 1       | Leaf cohorts averaged              |
| 59 | all     | 1 | 15 | 465  | .    | 10.60 | Ribeiro & Brown 1999        | Fig. 1       | Leaf cohorts averaged              |
| 60 | chewers | 4 | 80 | 400  | .    | 10.68 | Coelho <i>et al.</i> 2012   | Text p. 455  | Habitats averaged                  |
| 61 | all     | 1 | 40 | 1600 | .    | 1.15  | Furlan <i>et al.</i> 2004   | Tab. 2       | Two years averaged                 |
| 62 | gallers | 1 | 40 | 1600 | 4.3  | .     | Furlan <i>et al.</i> 2004   | Tab. 2       | Two years averaged                 |
| 63 | all     | 1 | .  | .    | .    | 1.95  | Neves <i>et al.</i> 2010    | Fig. 2a      |                                    |
| 64 | all     | 1 | .  | .    | .    | 6.60  | Neves <i>et al.</i> 2010    | Fig. 2a      |                                    |
| 65 | gallers | 1 | 30 | .    | 22.8 | .     | Araújo <i>et al.</i> 2011   | Text p. 1593 | Two habitats averaged              |
| 66 | all     | 1 | 6  | .    | .    | 0.00  | Gadotti & Batalha 2010      | Tab. 2       | Control                            |
| 67 | all     | 1 | 9  | .    | .    | 0.90  | Gadotti & Batalha 2010      | Tab. 2       | Control                            |
| 68 | all     | 1 | 18 | .    | .    | 1.80  | Gadotti & Batalha 2010      | Tab. 2       | Control                            |
| 69 | all     | 1 | 4  | .    | .    | 1.80  | Gadotti & Batalha 2010      | Tab. 2       | Control                            |

|     |         |    |    |      |       |       |                                 |                   |                                       |
|-----|---------|----|----|------|-------|-------|---------------------------------|-------------------|---------------------------------------|
| 70  | all     | 1  | 13 | .    | .     | 2.20  | Gadotti & Batalha 2010          | Tab. 2            | Control                               |
| 71  | all     | 1  | 2  | .    | .     | 2.60  | Gadotti & Batalha 2010          | Tab. 2            | Control                               |
| 72  | all     | 1  | 30 | .    | .     | 2.80  | Gadotti & Batalha 2010          | Tab. 2            | Control                               |
| 73  | all     | 1  | 2  | .    | .     | 2.90  | Gadotti & Batalha 2010          | Tab. 2            | Control                               |
| 74  | all     | 1  | 2  | .    | .     | 3.90  | Gadotti & Batalha 2010          | Tab. 2            | Control                               |
| 75  | all     | 1  | 5  | .    | .     | 6.80  | Gadotti & Batalha 2010          | Tab. 2            | Control                               |
| 76  | all     | 1  | 1  | .    | .     | 12.30 | Gadotti & Batalha 2010          | Tab. 2            | Control                               |
| 77  | chewers | 1  | 30 | 150  | .     | 2.81  | Fernandes <i>et al.</i> 2012    | Fig. 2            | Two years averaged                    |
| 78  | gallers | 1  | 30 | 150  | .     | 7.94  | Fernandes <i>et al.</i> 2012    | Fig. 2            | Two years averaged                    |
| 79  | all     | 1  | 15 | 300  | .     | 2.40  | Del-Claro <i>et al.</i> 1996    | Fig 1             | Controls for 2 dates averaged         |
| 80  | all     | 1  | 23 | 207  | .     | 10.40 | Korndorfer & Del-Claro 2006     | Fig. 1a           | Control plants                        |
| 81  | all     | 1  | 15 | 180  | .     | 19.83 | Nahas <i>et al.</i> 2012        | Pers. comm.       | Control group, last census (May 2010) |
| 82  | chewers | 5  | 20 | 2790 | .     | 5.16  | Neves <i>et al.</i> 2014        | Fig. 5            | Late successional stage               |
| 83  | miners  | 5  | 20 | 2790 | 35.5  | .     | Neves <i>et al.</i> 2014        | Fig. 5            | Late successional stage               |
| 84  | gallers | 5  | 20 | 2790 | 0.5   | .     | Neves <i>et al.</i> 2014        | Text p. 17        | All stages averaged                   |
| 85  | chewers | 1  | 27 | 1296 | .     | 4.94  | Leite <i>et al.</i> 2013        | Tab. 1            | Four seasons averaged                 |
| 86  | miners  | 1  | 27 | 1296 | .     | 0.10  | Leite <i>et al.</i> 2013        | Tab. 1            | Four seasons averaged                 |
| 87  | gallers | 1  | 27 | 1296 | 37.9  | 7.18  | Leite <i>et al.</i> 2013        | Tab. 2            | Four seasons averaged                 |
| 88  | chewers | 1  | 12 | 576  | .     | 3.45  | Leite <i>et al.</i> 2012        | Tab. 3            | Cerrado only                          |
| 89  | miners  | 1  | 12 | 576  | 15.9  | .     | Leite <i>et al.</i> 2012        | Tab. 3            | Cerrado only                          |
| 90  | chewers | 1  | 20 | 682  | 57.8  | 9.00  | Mello 2007                      | Fig. 2, text p. 4 |                                       |
| 91  | chewers | 1  | 15 | 750  | .     | 10.90 | Cuevas-Reyes <i>et al.</i> 2013 | Text p. 559       | Rural site only                       |
| 92  | miners  | 1  | 15 | 225  | 7.1   | .     | Tito <i>et al.</i> 2012         | Text p. 14        | Shrubby restinga                      |
| 93  | miners  | 1  | 15 | 225  | 0.4   | .     | Tito <i>et al.</i> 2012         | Text p. 14        | Arboreal restinga                     |
| 94  | chewers | 1  | 15 | 450  | 26.4  | 0.40  | da Costa <i>et al.</i> 2013     | Fig. 1            |                                       |
| 95  | all     | 49 | 20 | 4815 | .     | 1.35  | Zava & Cianciaruso 2014         | Text p. 628       |                                       |
| 96  | all     | 1  | 16 | 80   | .     | 15.10 | Francoso <i>et al.</i> 2013     | Text p. 224       |                                       |
| 97  | all     | 1  | 15 | 75   | .     | 5.00  | Francoso <i>et al.</i> 2013     | Text p. 224       |                                       |
| 98  | chewers | 1  | 8  | 32   | 100.0 | 3.45  | Eutrópio & Silva 2009           | Tab. 1            | Old leaves only                       |
| 99  | all     | .  | 10 | 20   | .     | 7.66  | Krohling <i>et al.</i> 2010     | Tab. 1            | Mature leaves only                    |
| 100 | all     | 1  | 20 | 100  | .     | 1.11  | Loyola & Fernandes 1993         | Tab. 5            | Mature leaves                         |

|     |     |   |     |      |   |       |                             |             |              |
|-----|-----|---|-----|------|---|-------|-----------------------------|-------------|--------------|
| 101 | all | 1 | 282 | 2000 | . | 4.87  | Vasconcelos & Davidson 2000 | Text p. 104 | Weighed mean |
| 102 | all | 1 | 47  | 350  | . | 10.32 | Vasconcelos & Davidson 2000 | Text p. 104 | Weighed mean |

## References

- Araújo S.W., Julião G.R., Ribeiro B.A., Silva I.P.A. & Santos B.B. (2011). Diversity of galling insects in *Styrax pohlii* (Styracaceae): edge effect and use as bioindicators. *Revista de Biologia Tropical*, 59, 1589-1597.
- Bizerril M.X.A. & Vieira E.M. (2002). Azteca ants as antiherbivore agents of *Tococa formicaria* (Melastomataceae) in Brazilian Cerrado. *Studies on Neotropical Fauna and Environment*, 37, 145-149.
- Bruna E.M., Lapola D.M. & Vasconcelos H.L. (2004). Interspecific variation in the defensive responses of obligate plant-ants: experimental tests and consequences for herbivory. *Oecologia*, 138, 558-565.
- Byk J. & Del-Claro K. (2010). Nectar- and pollen-gathering *Cephalotes* ants provide no protection against herbivory: a new manipulative experiment to test ant protective capabilities. *Acta Ethologica*, 13, 33-38.
- Coelho M.S., Belmiro M.S., Santos J.C. & Fernandes G.W. (2012). Herbivory among habitats on the neotropical tree *Cnidoscolus quercifolius* Pohl. in a seasonally deciduous forest. *Brazilian Journal of Biology*, 72, 453-457.
- Cornelissen T.G. & Fernandes G.W. (2001). Defence, growth and nutrient allocation in the tropical shrub *Bauhinia brevipes* (Leguminosae). *Austral Ecology*, 26, 246-253.
- Costa F.M.C.B., Oliveira A.T. & Oliveira P.S. (1992). The role of extrafloral nectaries in *Qualea grandiflora* (Vochysiaceae) in limiting herbivory: an experiment of ant protection in cerrado vegetation. *Ecological Entomology*, 17, 363-365.
- Cuevas-Reyes P., Gilberti L., González-Rodríguez A. & Fernandes G.W. (2013). Patterns of herbivory and fluctuating asymmetry in *Solanum lycocarpum* St. Hill (Solanaceae) along an urban gradient in Brazil. *Ecological Indicators*, 24, 557-561.
- da Costa F.V., de Azevedo I.F.P., Braga L.D., Perillo L.N., Neves F.D., Leite L.O., da Silva B.L.R., Ribeiro L.C., Fernandes G.W. & Cuevas-Reyes P. (2013). Fluctuating asymmetry and herbivory in two ontogenetical stages of *Chamaecrista semaphora* in restored and natural environments. *Journal of Plant Interactions*, 8, 179-186.
- Del-Claro K., Berto V. & Réu W. (1996). Effect of herbivore deterrence by ants on the fruit set of an extrafloral nectary plant, *Qualea multiflora* (Vochysiaceae). *Journal of Tropical Ecology*, 12, 887-892.
- Eutrópico F.J. & Silva A.G. (2009). Comparative analysis of leaf area loss by herbivory in *Croton* sp. at the REBIO of Duas Bocas, Cariacica, Espírito Santo, Southeastern Brazil. *Natureza on line*, 7, 27-30.
- Fernandes G.W., Santos J.C. & Gomes V.M. (2012). Misleading herbivory in a tropical tree. *Arthropod-Plant Interactions*, 6, 649-654.
- Françoso R.D., Goeller A.J. & Lenza E. (2013). Herbivory and leaf mass in *Peltogyne confertiflora* (Mart. ex Hayne) Benth. Fabales Bromhead Fabaceae Lindl. at forest and cerrado. *Ecología Austral*, 23, 222-226.
- Furlan C.M., Salatino A. & Domingos M. (2004). Influence of air pollution on leaf chemistry, herbivore feeding and gall frequency on *Tibouchina pulchra* leaves in Cubatão (Brazil). *Biochemical Systematics and Ecology*, 32, 253-263.



- Gadotti C.A. & Batalha M.A. (2010). The 'Herbivory Uncertainty Principle': application in a cerrado site. *Brazilian Journal of Biology*, 70, 279-282.
- Gonçalves-Alvim S.J., Collevatti R.G. & Fernandes G.W. (2004). Effects of genetic variability and habitat of *Qualea parviflora* (Vochysiaceae) on herbivory by free-feeding and gall-forming insects. *Annals of Botany*, 94, 259-268.
- Gonçalves-Alvim S.J., Lana T.C., Ranieri B.D., Silveira F.A.O., Ribeiro V. & Fernandes G.W. (2010). Growth, defense and herbivory on young leaves of *Qualea parviflora* (Vochysiaceae) in three different cerrado habitats. *Neotropical Biology and Conservation*, 5, 86-92.
- Gonçalves-Alvim S.J., Lana T.C., Ranieri B.D. & Fernandes G.W. (2011). Test of hypotheses about herbivory and chemical defences of *Qualea parviflora* (Vochysiaceae) in Brazilian cerrado. *Revista Brasileira de Botânica*, 34, 223-230.
- Korndörfer A.P. & Del-Claro K. (2006). Ant defense versus induced defense in *Lafoensia pacari* (Lythraceae), a myrmecophilous tree of the Brazilian cerrado. *Biotropica*, 38, 786-788.
- Krohling C.A., Eutrópio F.J. & Silva A.G. (2010). Insect-plant interactions in *Solanum hexandrum* Vell. (Solanaceae): pollination and herbivory in the Biological Reserve of Duas Bocas, Cariacica, Espírito Santo. *Natureza on line*, 8, 78-85.
- Leite G.L.D., Veloso R.V., Zanuncio J.C., Almeida C.I.M.E., Ferreira P.S.F., Fernandes G.W. & Soares M.A. (2012). Habitat complexity and *Caryocar brasiliense* herbivores (Insecta: Arachnida: Araneae). *Florida Entomologist*, 95, 819-830.
- Leite G.L.D., Veloso R.V., Zanuncio J.C., Fernandes G.W., Almeida C.I.M., Pereira J.M.M., Serrão J.E. & Soares M.A. (2013). Seasonal abundance of galling Insects (Hymenoptera) on *Caryocar brasiliense* (Malpighiales: Caryocaraceae) trees in the cerrado. *Florida Entomologist*, 96, 797-809.
- Leite G.L.O., Veloso R.V., Zanuncio J.C., Almeida C.I.M., Ferreira P.S.F., Serrão J.E. & Ramalho F.S. (2012). Seasonal damage caused by herbivorous insects on *Caryocar brasiliense* (Caryocaraceae) trees in the Brazilian savanna. *Revista Colombiana de Entomología*, 38, 108-113.
- Loyola R.Jr. & Fernandes G.W. (1993). Herbivory on *Kielmeyra coriacea* (Guttiferae): the effects of plant age, leaf development and quality. *Revista Brasileira de Biologia*, 53, 295-304.
- Marquis R.J., Diniz I.R. & Morais H.C. (2001). Patterns and correlates of interspecific variation in foliar insect herbivory and pathogen attack in Brazilian cerrado. *Journal of Tropical Ecology*, 17, 127-148.
- Mello M.A.R. (2007). Influence of herbivore attack patterns on reproductive success of the shrub *Piper hispidum* (Piperaceae). *Ecotropica*, 13, 1-6.
- Moreira V.S.S. & Del-Claro K. (2005). The outcomes of an ant-treehopper association on *Solanum lycocarpum* St. Hill: increased membracid fecundity and reduced damage by chewing herbivores. *Neotropical Entomology*, 34, 881-887.
- Nahas L., Gonzaga M.O. & Del-Claro K. (2012). Emergent impacts of ant and spider interactions: Herbivory reduction in a tropical savanna tree. *Biotropica*, 44, 498-505.
- Nascimento M.T. & Proctor J. (2001). Leaf herbivory on three tree species in a monodominant and two other terra firme forests on Maracá Island, Brazil. *Acta Amazonica*, 31, 1-12.
- Nascimento M.T., Villela D.M. & De Lacerda L.D. (1990). Foliar growth, longevity and herbivory in two "cerado" species near Cuiaba, MT, Brazil. *Revista Brasileira de Botânica*, 13, 27-32.
- Neves F.S., Araújo L.S., Espírito-Santo M.M., Fagundes M., Fernandes G.W., Sanchez-Azofeifa G.A. & Quesada M. (2010). Canopy herbivory and insect herbivore diversity in a dry forest-savanna transition in Brazil. *Biotropica*, 42, 112-118.

- Neves F.S., Silva J.O., Espírito-Santo M.M. & Fernandes G.W. (2014). Insect herbivores and leaf damage along successional and vertical gradients in a tropical dry forest. *Biotropica*, 46, 14-24.
- Oliveira K.N., Espírito-Santo M.M., Silva J.O. & Melo G.A. (2012). Ontogenetic and temporal variations in herbivory and defense of *Handroanthus spongiosus* (Bignoniaceae) in a Brazilian tropical dry forest. *Environmental Entomology*, 41, 541-550.
- Ribeiro S.P. & Brown V.K. (1999). Insect herbivory in tree crowns of *Tabebuia aurea* and *T. ochracea* (Bignoniaceae) in Brazil: contrasting the cerrado with the "Pantanal Matogrossense". *Selbyana*, 20, 159-170.
- Ribeiro S.P., Pimenta H.R. & Fernandes G.W. (1994). Herbivory by chewing and sucking insects on *Tabebuia ochracea*. *Biotropica*, 26, 302-307.
- Silva J.O., Espírito-Santo M.M. & Melo G.A. (2012). Herbivory on *Handroanthus ochraceus* (Bignoniaceae) along a successional gradient in a tropical dry forest. *Arthropod-Plant Interactions*, 6, 45-57.
- Tito R., Geisler G.E., de Souza L.P., Castellani T.T. & Lopes B.C. (2012). Herbivory in *Gomidesia palustris* (Myrtaceae) in two formations of restinga, southern Brazil. In: *Association for Tropical Biology and Conservation. 49th annual meeting. Bonito, Mato Grosso de Sul, Brazil. Abstracts*, pp. 817.
- Varanda E.M. & Pais M.P. (2006). Insect folivory in *Didymopanax vinosum* (Apiaceae) in a vegetation mosaic of Brazilian cerrado. *Brazilian Journal of Biology*, 66, 671-680.
- Vasconcelos H.L. (1991). Mutualism between *Maieta guianensis* Aubl., a myrmecophytic melastome, and one of its ant inhabitants - ant protection against insect herbivores. *Oecologia*, 87, 295-298.
- Vasconcelos H.L. (1999). Levels of leaf herbivory in Amazonian trees from different stages in forest regeneration. *Acta Amazonica*, 29, 615-623.
- Vasconcelos H.L. & Davidson D.W. (2000). Relationship between plant size and ant associates in two Amazonian ant-plants. *Biotropica*, 32, 100-111.
- Zava P.C. & Cianciaruso M.V. (2014). Can we use plant traits and soil characteristics to predict leaf damage in savanna woody species? *Plant Ecology*, 215, 625-637.
