# Supplementary material for: Confirmation bias leads to overestimation of losses of woody plant foliage to insect herbivores in tropical regions
Source: PubMed Central journal article supplement (PMC4277485; doi:10.7717/peerj.709), 2014-12-23
Supplement: peerj-02-709-s002.pdf [file peerj-02-709-s002.pdf]

**Appendix 2.** Foliar damage of woody plants measured in the field and from photographs of these plants<sup>1</sup>.

| Photo # | Locality   | Habitat             | Plant species <sup>2</sup>               | Feeding guild | Field measurements <sup>3</sup> |      |      | Measurements taken from photographs <sup>4</sup> |      |      |
|---------|------------|---------------------|------------------------------------------|---------------|---------------------------------|------|------|--------------------------------------------------|------|------|
|         |            |                     |                                          |               | n                               | dam  | cons | n                                                | dam  | cons |
| 105     | Ilhéus     | Atlantic forest     | Melastomataceae, <i>Henriettella</i> sp. | chewers       | 167                             | 80.0 | 5.76 | 81                                               | 40.7 | 1.06 |
|         |            |                     |                                          | gallers       | 167                             | 0    | 0    |                                                  |      |      |
|         |            |                     |                                          | miners        | 167                             | 0    | 0    |                                                  |      |      |
| 107     | Ilhéus     | Atlantic forest     | Moraceae or Sapotaceae                   | chewers       | 219                             | 11.9 | 0.22 | 166                                              | 13.2 | 0.36 |
|         |            |                     |                                          | gallers       | 219                             | 0    | 0    |                                                  |      |      |
|         |            |                     |                                          | miners        | 219                             | 0    | 0    |                                                  |      |      |
| 125     | Ilhéus     | Atlantic forest     |                                          | chewers       | 166                             | 41.8 | 2.83 | 56                                               | 44.6 | 4.09 |
|         |            |                     |                                          | gallers       | 166                             | 0.7  | 0.02 |                                                  |      |      |
|         |            |                     |                                          | miners        | 166                             | 3.7  | 0.11 |                                                  |      |      |
| 130     | Diamantina | Subalpine shrubland | Asteraceae, <i>Vernonanthura</i> sp. (?) | chewers       | 243                             | 79.1 | 8.68 | 118                                              | 59.3 | 4.95 |
|         |            |                     |                                          | gallers       | 243                             | 0    | 0    |                                                  |      |      |
|         |            |                     |                                          | miners        | 243                             | 1.9  | 0.06 |                                                  |      |      |
| 163     | Diamantina | Subalpine shrubland | Fabaceae, Caesalpinioideae               | chewers       | 239                             | 51.2 | 4.10 | 245                                              | 24.4 | 1.73 |
|         |            |                     |                                          | gallers       | 239                             | 0    | 0    |                                                  |      |      |
|         |            |                     |                                          | miners        | 239                             | 0.4  | 0.01 |                                                  |      |      |
| 164     | Diamantina | Subalpine shrubland | Asteraceae                               | chewers       | 185                             | 14.2 | 0.69 | 151                                              | 14.6 | 0.77 |
|         |            |                     |                                          | gallers       | 185                             | 0    | 0    |                                                  |      |      |
|         |            |                     |                                          | miners        | 185                             | 1.8  | 0.26 |                                                  |      |      |
| 166     | Diamantina | Subalpine shrubland | Lythraceae (?)                           | chewers       | 227                             | 60.9 | 8.28 | - <sup>5</sup>                                   | -    | -    |
|         |            |                     |                                          | gallers       | 227                             | 0    | 0    |                                                  |      |      |
|         |            |                     |                                          | miners        | 227                             | 0    | 0    |                                                  |      |      |
| 283     | Novo Airão | Riverside           | Fabaceae, Mimosoideae                    | chewers       | 168                             | 94.7 | 5.74 | 151                                              | 32.4 | 1.33 |

<sup>1</sup> High-resolution images available from authors upon request.

<sup>2</sup> Identified from a photograph by K. Ruokalainen.

<sup>3</sup> Mean values based on measurements of two plant individuals (see text for details). n, total number of leaves; dam, proportion of leaves damaged by defoliating insects (%); cons, proportion of leaf area consumed by defoliating insects (%).

<sup>4</sup> Measurement is based on a photograph taken from one of two study individuals.

<sup>5</sup> The quality of the photograph is insufficient for measurements of foliar damage.

|     |          |           |                                    |         |     |      |       |     |      |      |
|-----|----------|-----------|------------------------------------|---------|-----|------|-------|-----|------|------|
|     |          |           |                                    | gallers | 168 | 0    | 0     |     |      |      |
|     |          |           |                                    | miners  | 168 | 0    | 0     |     |      |      |
| 471 | Pantanal | Riverside | Combretaceae, <i>Combretum</i> sp. | chewers | 213 | 78.8 | 14.02 | 146 | 56.2 | 4.12 |
|     |          |           |                                    | gallers | 213 | 0.9  | 0.03  |     |      |      |
|     |          |           |                                    | miners  | 213 | 1.9  | 0.02  |     |      |      |
| 472 | Pantanal | Riverside | Fabaceae, <i>Bauhinia</i> sp.      | chewers | 201 | 21.4 | 1.07  | 9   | 55.6 | 3.78 |
|     |          |           |                                    | gallers | 201 | 0    | 0     |     |      |      |
|     |          |           |                                    | miners  | 201 | 0    | 0     |     |      |      |

### Photographs

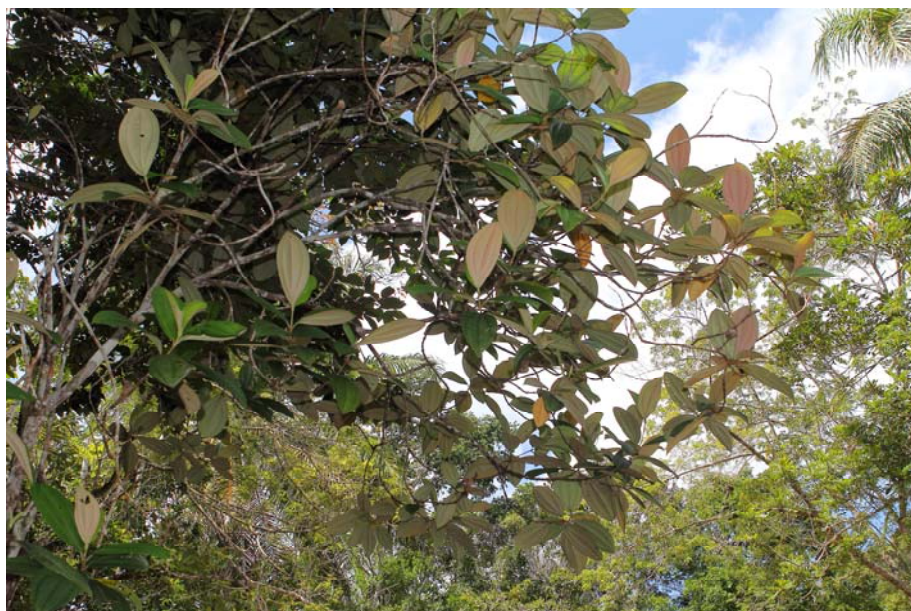

105

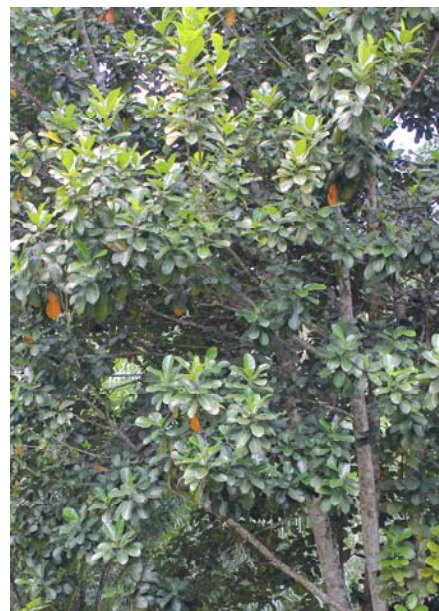

107

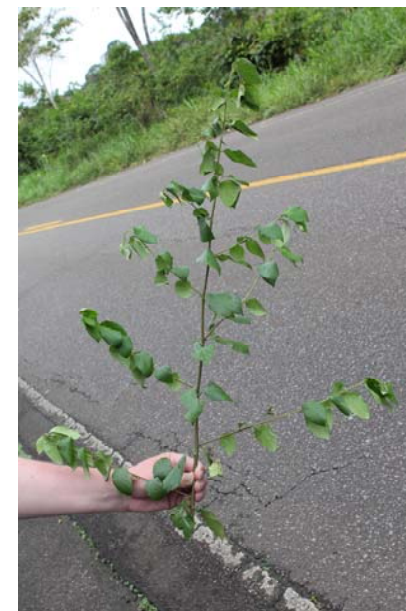

125

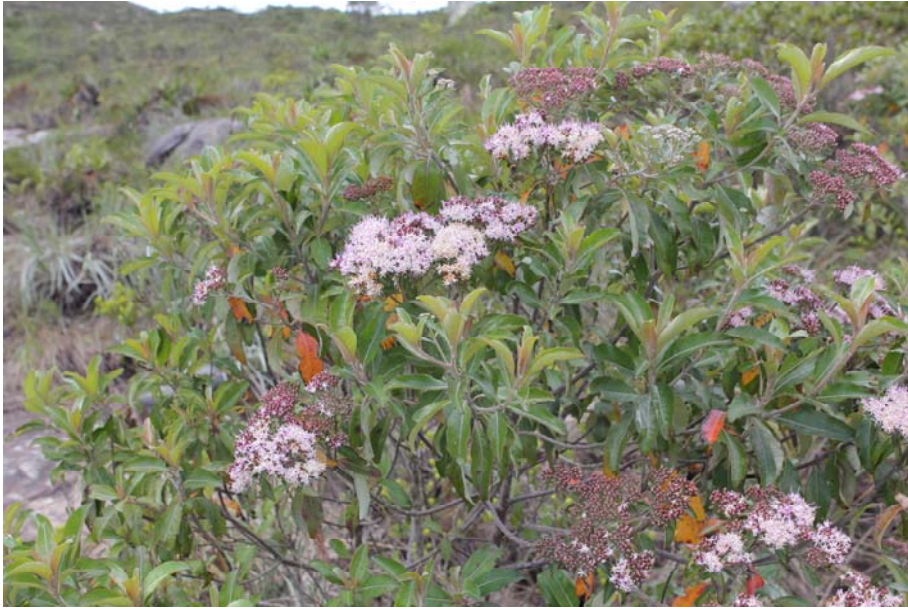

130

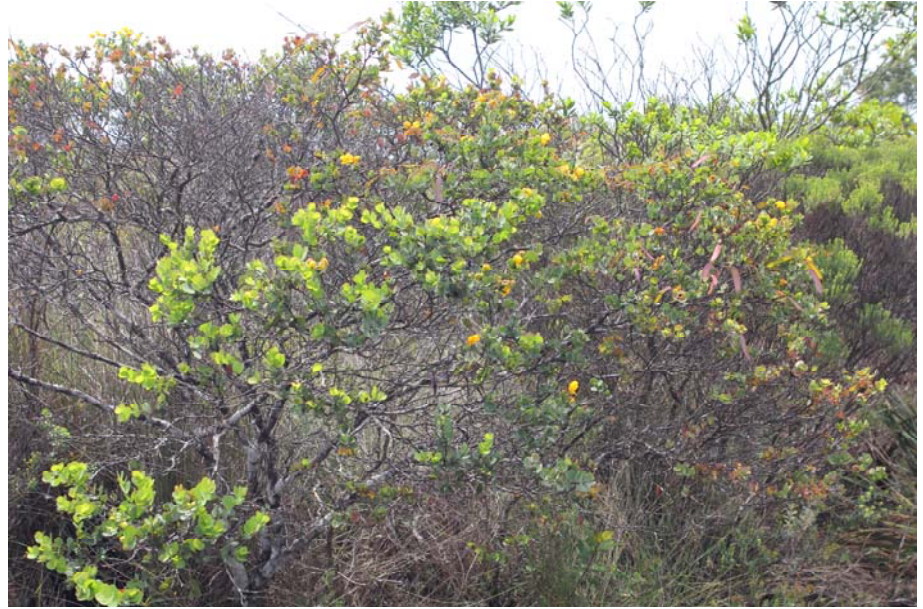

163

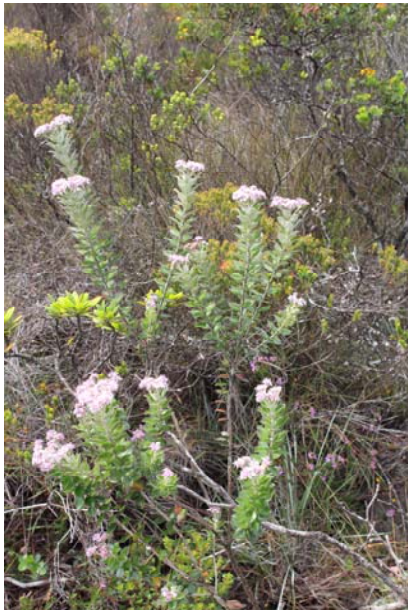

164

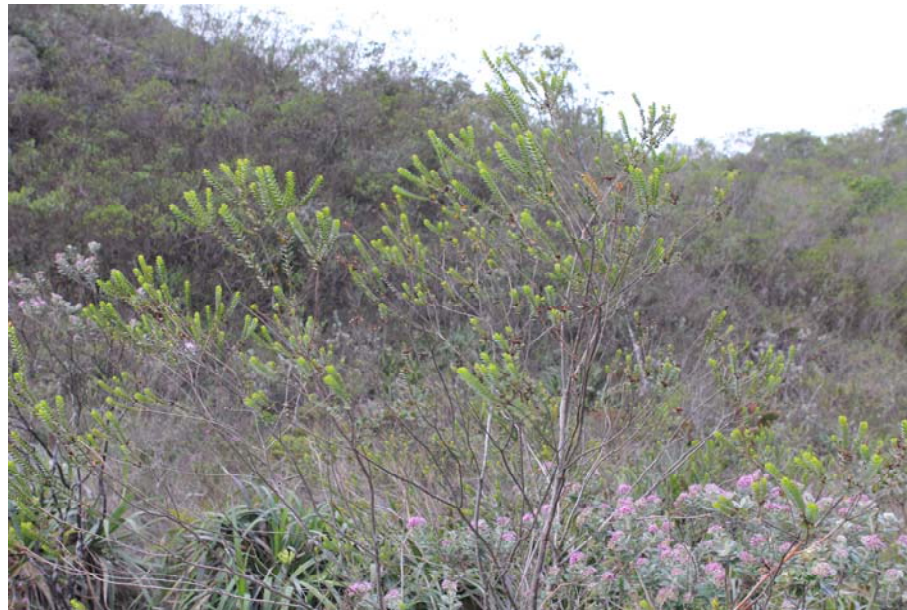

166

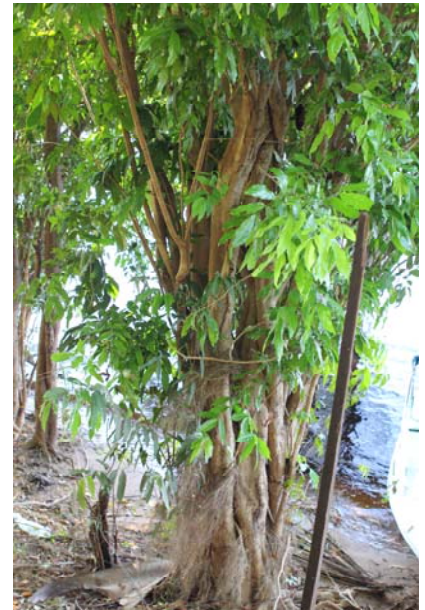

283

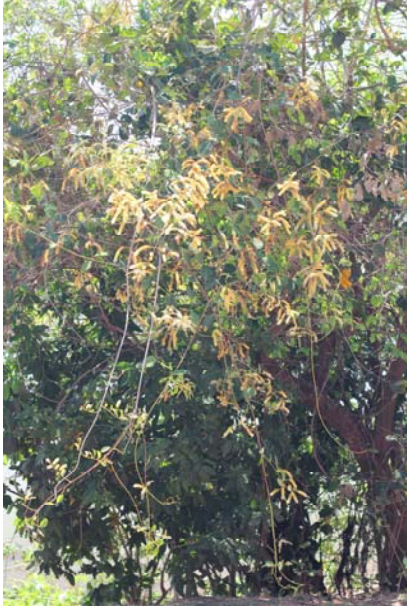

471

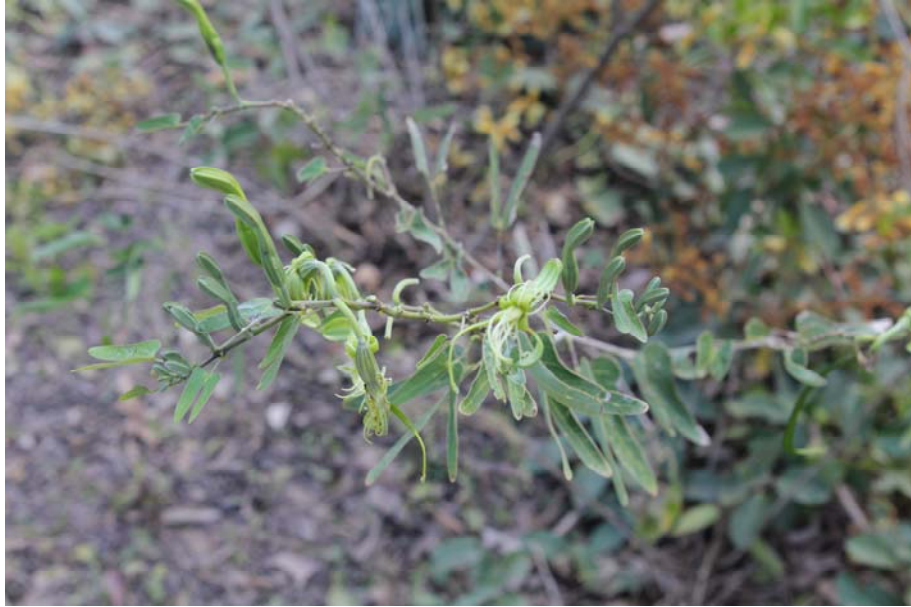

473
