# Supplementary material for: Confirmation bias leads to overestimation of losses of woody plant foliage to insect herbivores in tropical regions
Source: PubMed Central journal article supplement (PMC4277485; doi:10.7717/peerj.709), 2014-12-23
Supplement: peerj-02-709-s003.pdf [file peerj-02-709-s003.pdf]

**Appendix S3.** Foliar damage of woody plants measured from nature, wildlife and portrait photographs<sup>1</sup>.

| Photo # | Locality   | Habitat                | Plant species <sup>2</sup>               | Foliar damage <sup>3</sup> |      |       |
|---------|------------|------------------------|------------------------------------------|----------------------------|------|-------|
|         |            |                        |                                          | n                          | dam  | cons  |
| 072     | Diamantina | Subalpine shrubland    |                                          | 93                         | 6.8  | 0.17  |
| 075     | Diamantina | Subalpine shrubland    |                                          | 54                         | 28.3 | 2.74  |
| 076     | Diamantina | Subalpine shrubland    | Clusiaceae, <i>Clusia</i> sp.            | 147                        | 11.4 | 0.49  |
| 089     | Diamantina | Subalpine shrubland    |                                          | 39                         | 18.0 | 0.25  |
| 091     | Diamantina | Subalpine shrubland    |                                          | 154                        | 15.0 | 1.68  |
| 100     | Diamantina | Subalpine shrubland    | Melastomataceae, <i>Henriettella</i> sp. | 137                        | 6.4  | 0.78  |
| 130     | Diamantina | Subalpine shrubland    | Melastomataceae                          | 114                        | 11.2 | 0.61  |
| 176     | Novo Airão | Riverside              |                                          | 8                          | 0    | 0     |
| 198     | Novo Airão | Riverside              |                                          | 38                         | 26.9 | 3.60  |
| 218     | Novo Airão | Forest                 |                                          | 18                         | 4.6  | 0.06  |
| 219     | Novo Airão | Riverside              |                                          | 33                         | 13.4 | 0.34  |
| 225     | Novo Airão | Forest (submerged)     |                                          | 9                          | 7.9  | 3.99  |
| 4255    | Ilhéus     | Atlantic forest        | Melastomataceae, <i>Henriettella</i> sp. | 38                         | 52.9 | 5.34  |
| 4300    | Ilhéus     | Atlantic forest        |                                          | 14                         | 63.5 | 2.66  |
| 4326    | Ilhéus     | Atlantic forest        | Malvaceae, <i>Theobroma cacao</i>        | 135                        | 38.2 | 2.22  |
| 4343    | Diamantina | Subalpine shrubland    | Clusiaceae, <i>Clusia</i> sp.            | 80                         | 5.5  | 0.65  |
| 4351    | Diamantina | Subalpine shrubland    |                                          | 92                         | 5.0  | 0.14  |
| 4378    | Diamantina | Subalpine shrubland    | Melastomataceae                          | 70                         | 3.8  | 0.20  |
| 4407    | Diamantina | Forest                 |                                          | 28                         | 4.7  | 0.82  |
| 4407    | Diamantina | Forest                 |                                          | 61                         | 12.2 | 0.77  |
| 4439    | Diamantina | Forest                 |                                          | 102                        | 5.6  | 0.42  |
| 4471    | Novo Airão | Forest (at a roadside) |                                          | 67                         | 16.2 | 0.82  |
| 4541    | Novo Airão | Forest (submerged)     |                                          | 55                         | 2.4  | 0.04  |
| 4596    | Novo Airão | Riverside              | Myrtaceae, <i>Syzygium</i> sp.           | 92                         | 3.3  | 0.05  |
| 4726    | Novo Airão | Riverside              | Rubiaceae, <i>Warszewiczia</i> sp.       | 23                         | 36.6 | 1.91  |
| 4777    | Novo Airão | Forest (at a roadside) | Euphorbiaceae                            | 44                         | 76.9 | 1.84  |
| 5039    | Pantanal   | Roadside               |                                          | 90                         | 72.6 | 10.62 |
| 5226    | Pantanal   | Roadside               |                                          | 81                         | 14.0 | 0.86  |
| 5237    | Pantanal   | Roadside               |                                          | 77                         | 6.6  | 0.32  |
| 5342    | Pantanal   | Roadside               |                                          | 53                         | 13.7 | 0.60  |

<sup>1</sup> High-resolution images available from authors upon request.

<sup>2</sup> Identified from a photograph by K. Ruokalainen.

<sup>3</sup> Mean values based on three independent measurements (see text for details). n, number of leaves; dam, proportion of leaves damaged by defoliating insects (%); cons, proportion of leaf area consumed by defoliating insects (%).

**Photographs**

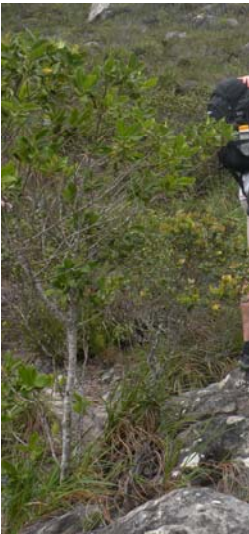

**72**

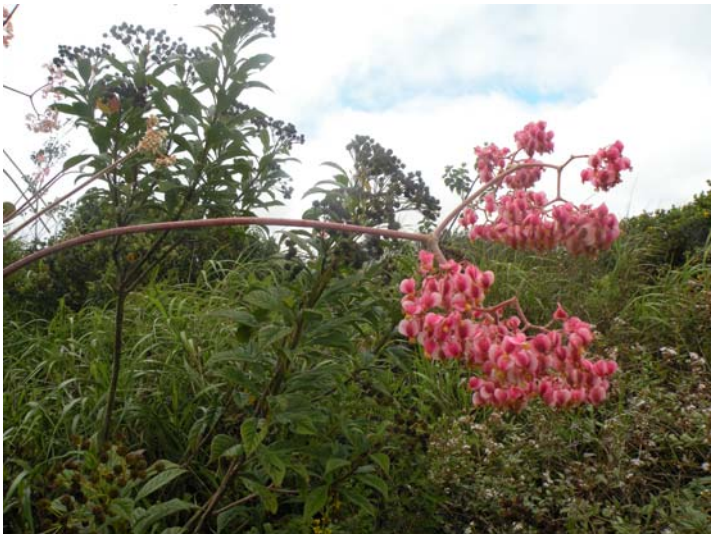

**075**

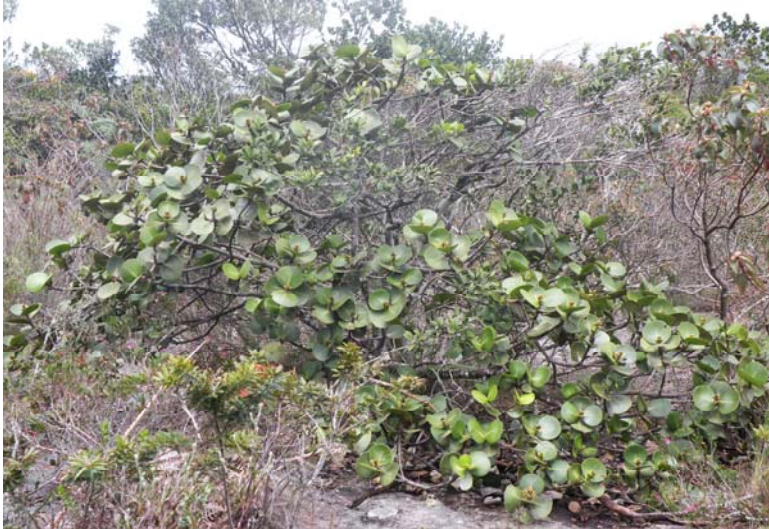

**076**

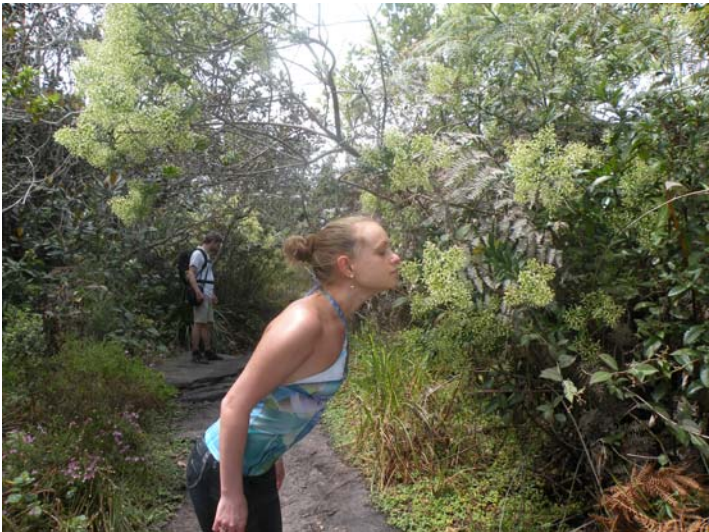

**089**



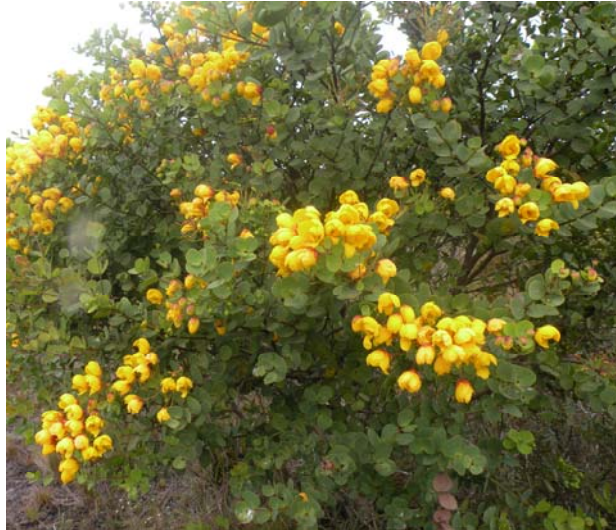

091

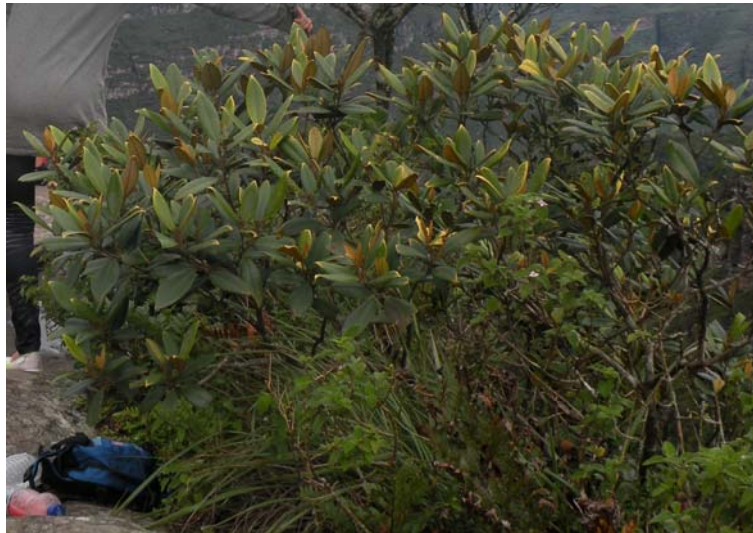

100

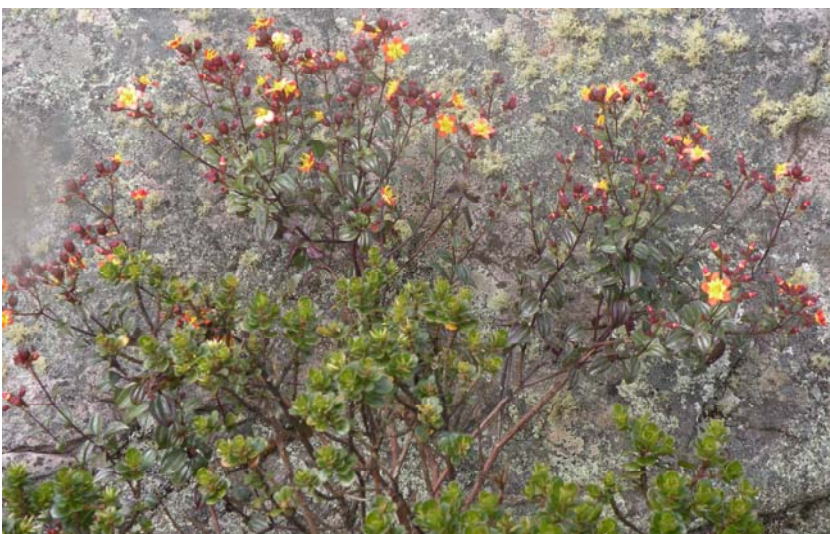

130

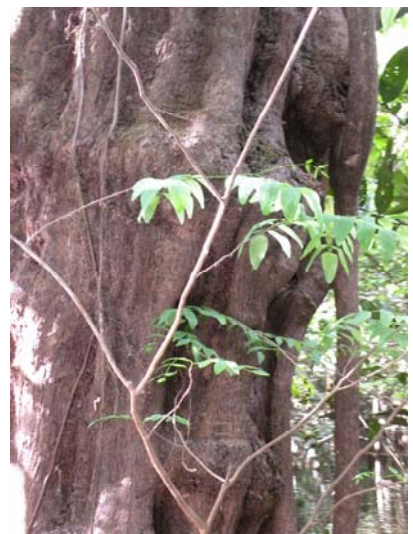

176



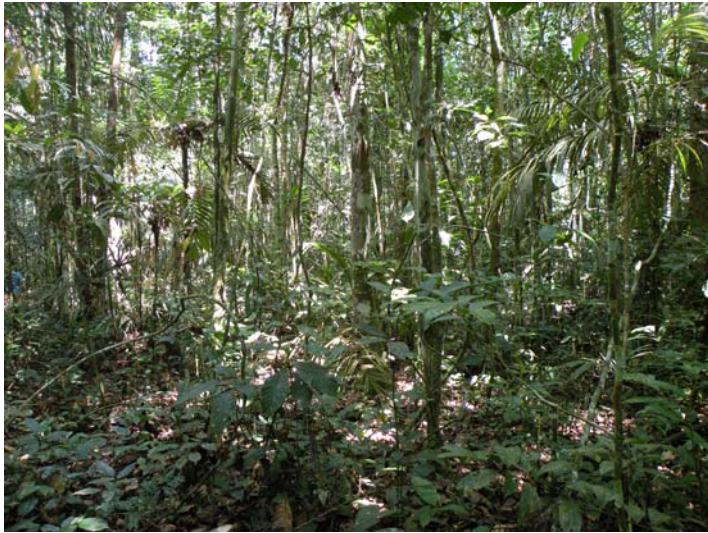

198

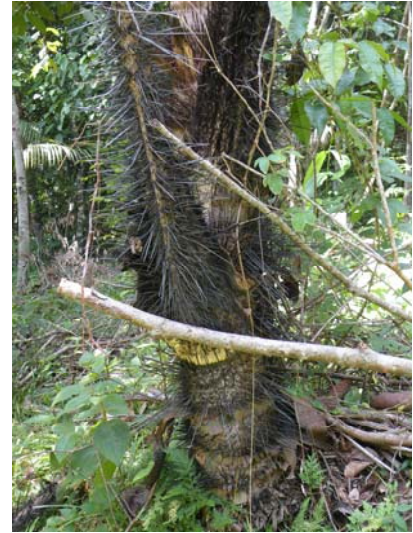

218

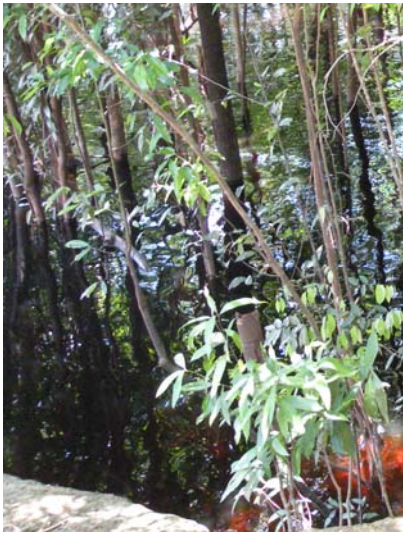

219

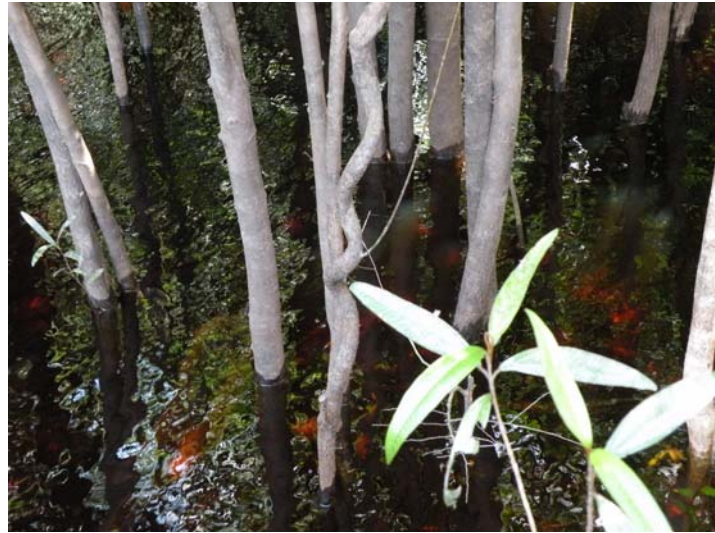

225

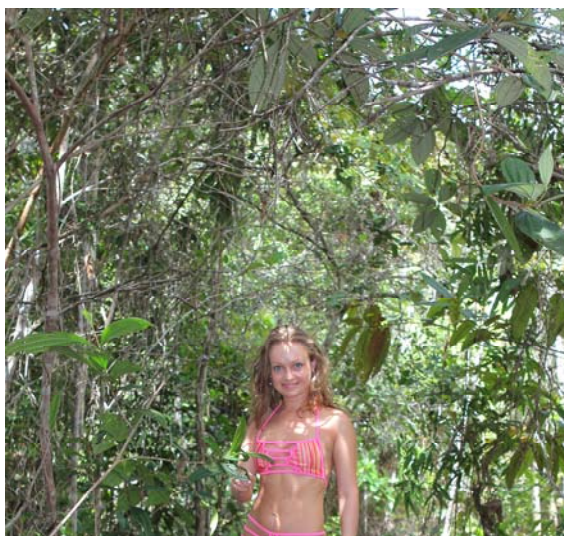

4255

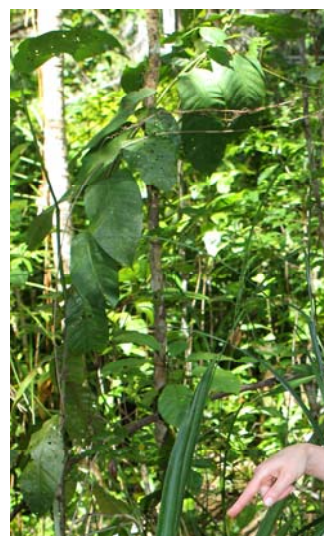

4300



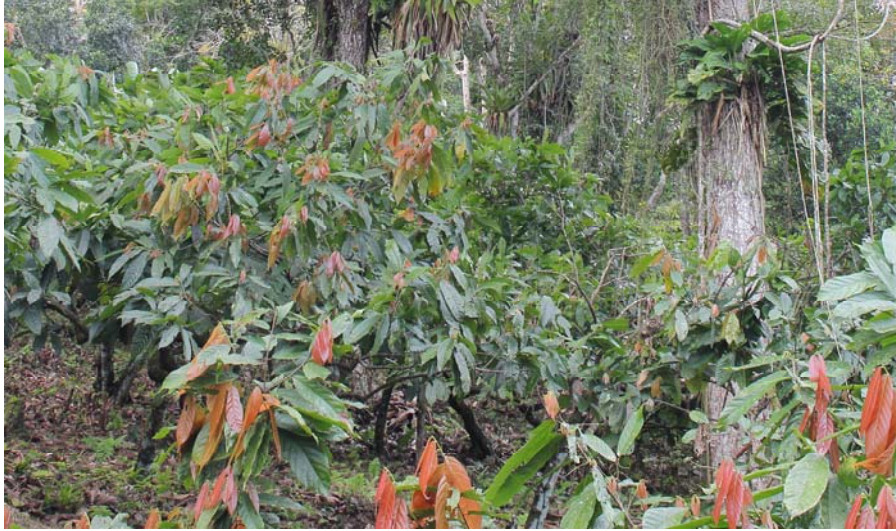

4326

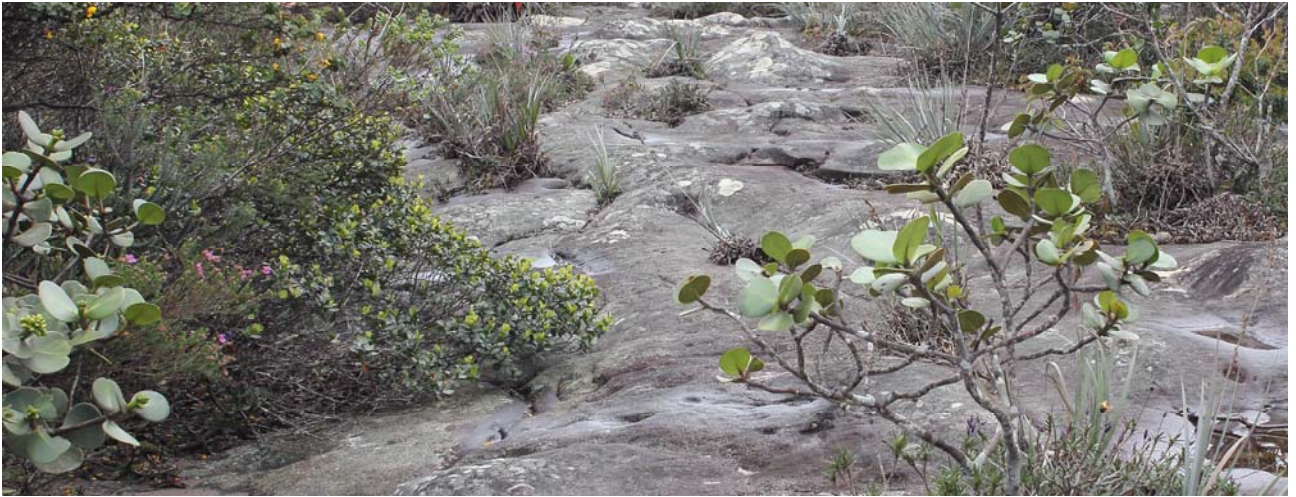

4343

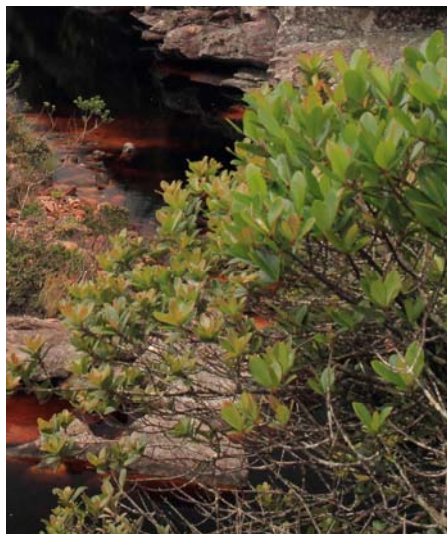

4351

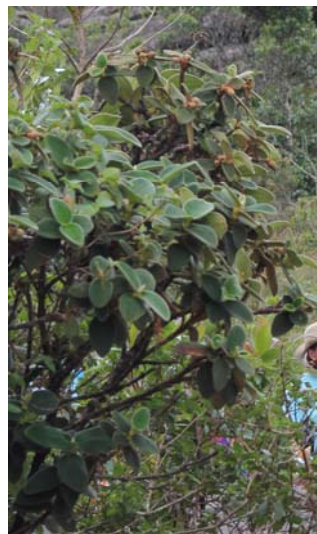

4378



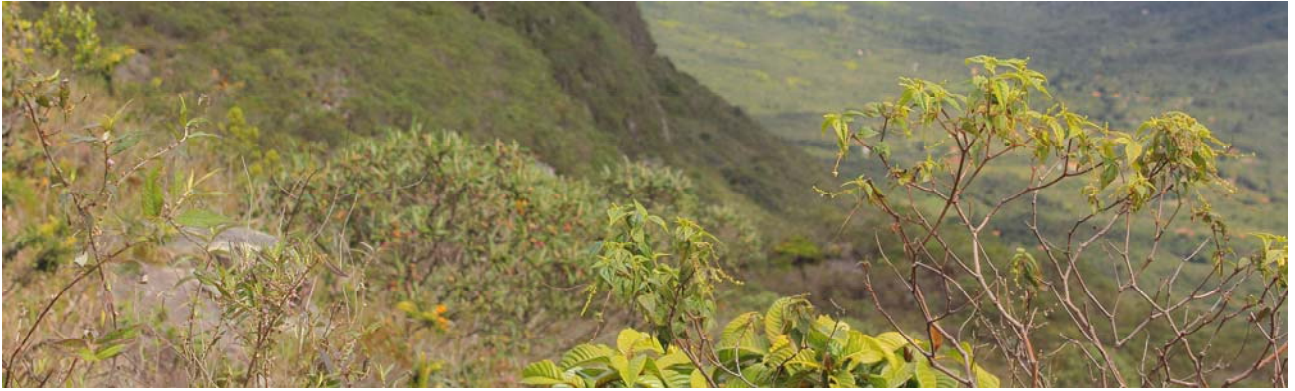

4407

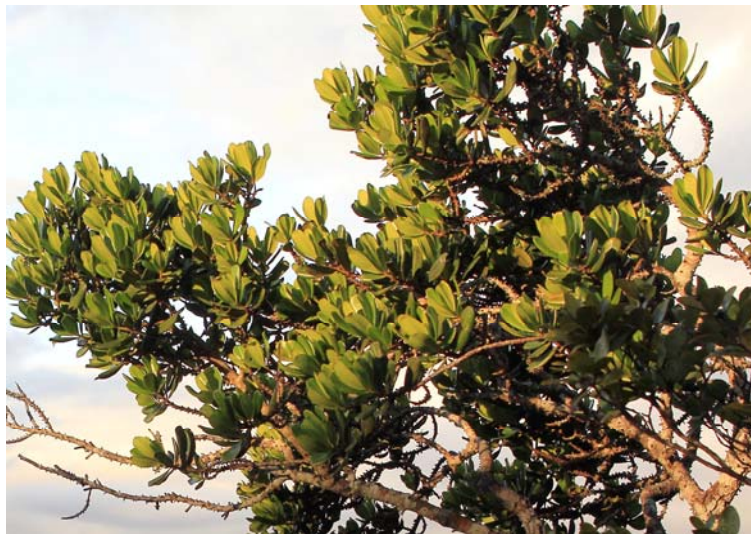

4439

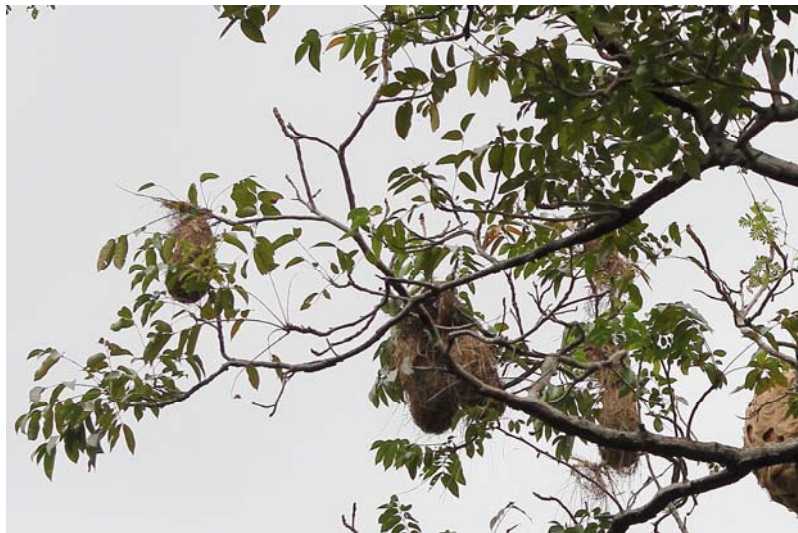

4471



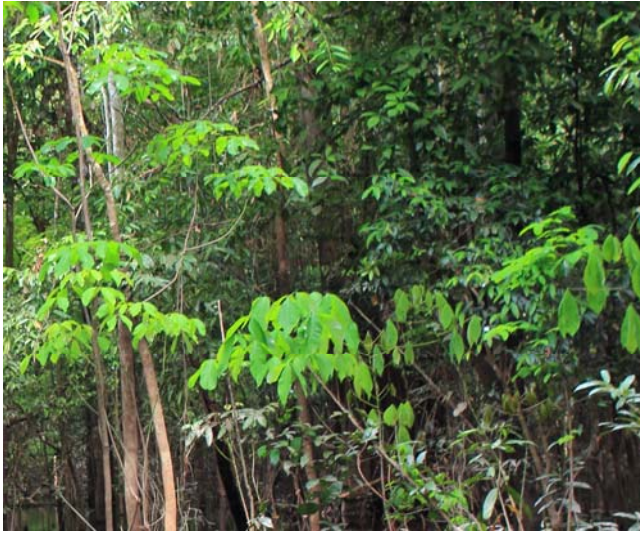

4541

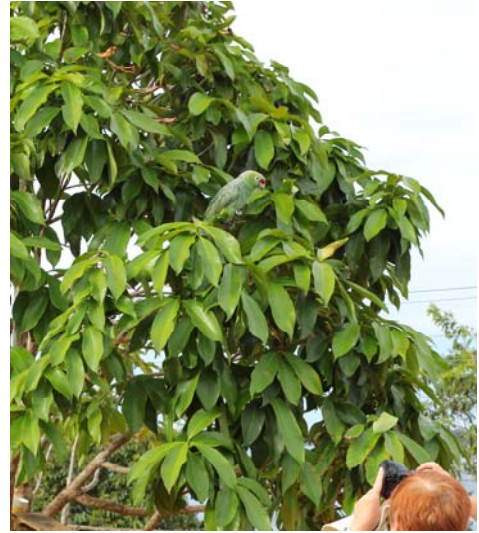

4596

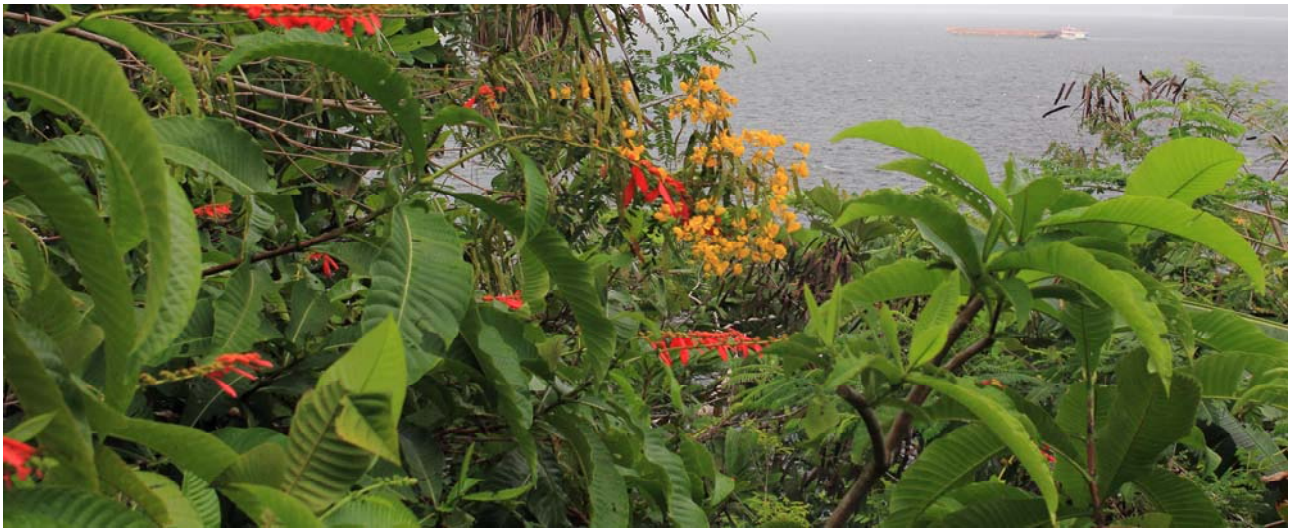

4726

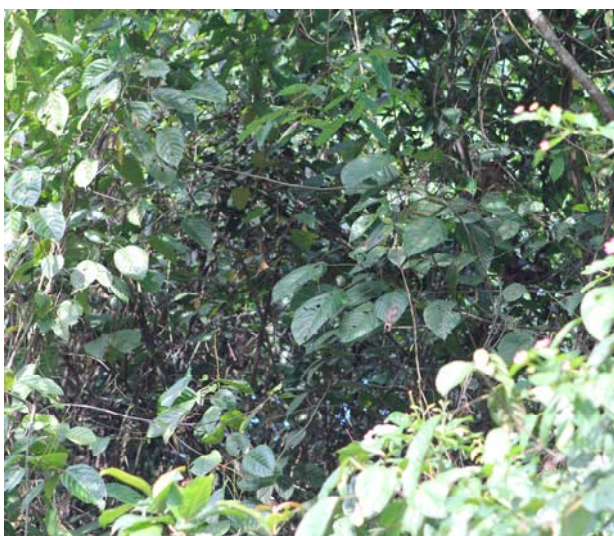

4777

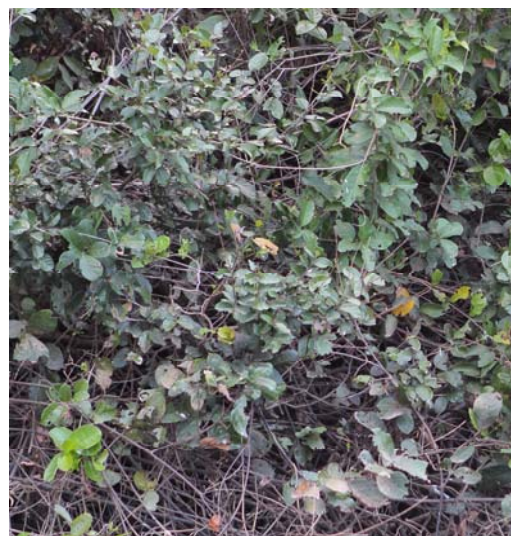

5039



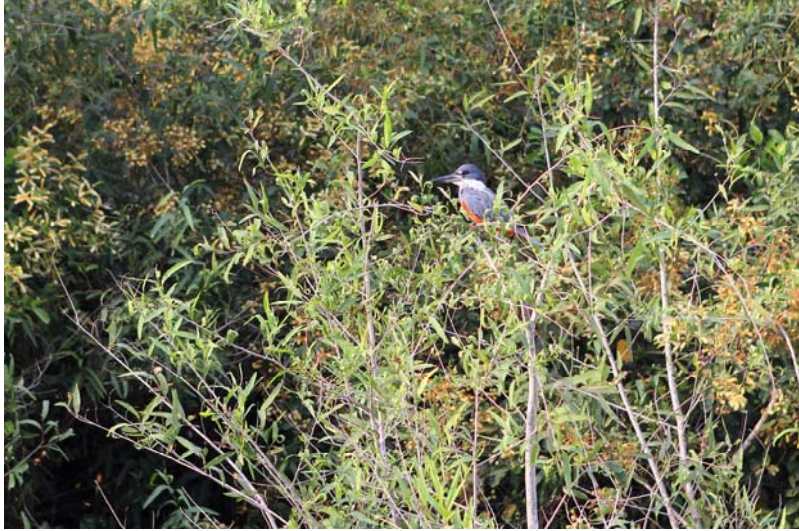

5226

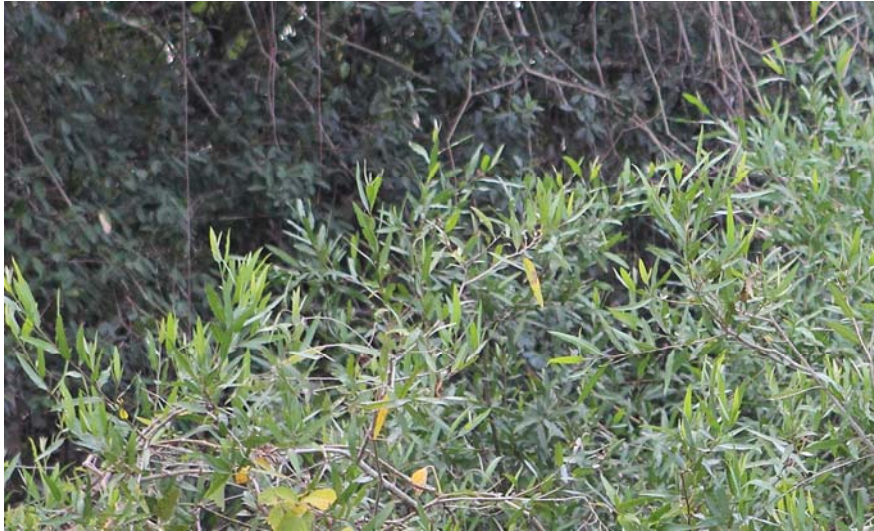

5237

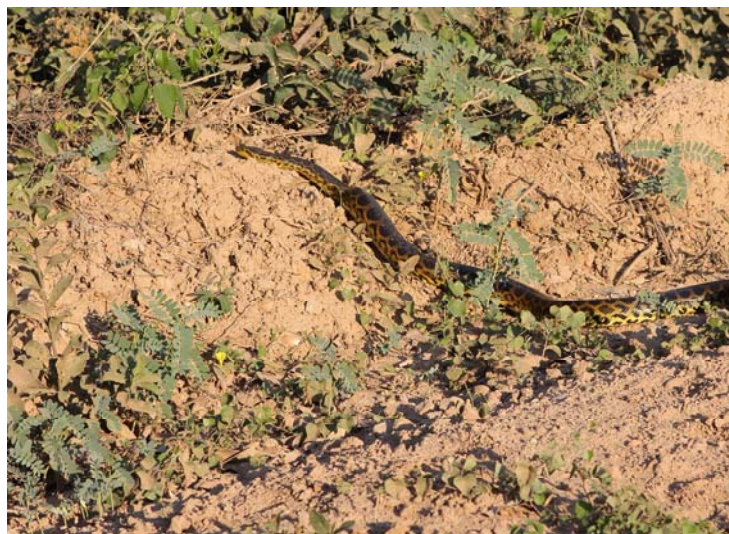

5342
