# Supplementary material for: Confirmation bias leads to overestimation of losses of woody plant foliage to insect herbivores in tropical regions
Source: PubMed Central journal article supplement (PMC4277485; doi:10.7717/peerj.709), 2014-12-23
Supplement: peerj-02-709-s004.pdf [file peerj-02-709-s004.pdf]

**Appendix S4.** Foliar damage of woody plants measured from nature and wildlife photographs found in the WWW.

| WWW page                                                                                                                                                                                                                      | Locality                          | Foliar damage <sup>1</sup> |      |      |
|-------------------------------------------------------------------------------------------------------------------------------------------------------------------------------------------------------------------------------|-----------------------------------|----------------------------|------|------|
|                                                                                                                                                                                                                               |                                   | n                          | dam  | cons |
| <a href="http://eco-turizm.net/wp-content/uploads/2012/09/водная-пустыня-Бразилия.jpg">http://eco-turizm.net/wp-content/uploads/2012/09/водная-пустыня-Бразилия.jpg</a>                                                       | Lencois Maranhenses               | 19                         | 15.8 | 0.21 |
| <a href="http://www.1zoom.ru/Природа/обои/337825/z2333.3/">http://www.1zoom.ru/Природа/обои/337825/z2333.3/</a>                                                                                                               | Iguassu Falls                     | 51                         | 41.2 | 1.74 |
| <a href="http://www.1zoom.ru/Природа/обои/373787/z3655.9/">http://www.1zoom.ru/Природа/обои/373787/z3655.9/</a>                                                                                                               | Iguassu Falls                     | 25                         | 24.0 | 1.00 |
| <a href="http://www.1zoom.ru/Природа/обои/337970/z2655.7/">http://www.1zoom.ru/Природа/обои/337970/z2655.7/</a>                                                                                                               | Iguassu Falls                     | 29                         | 17.2 | 0.67 |
| <a href="http://img1.liveinternet.ru/images/attach/c/6/91/785/91785683_large_supercoolpics_02_19092012221630.jpg">http://img1.liveinternet.ru/images/attach/c/6/91/785/91785683_large_supercoolpics_02_19092012221630.jpg</a> | NE Brazil                         | 15                         | 13.3 | 1.20 |
| <a href="http://www.brasileiro.ru/cerrado/images/IMG_0648.JPG.jpg">http://www.brasileiro.ru/cerrado/images/IMG_0648.JPG.jpg</a>                                                                                               | Goiás                             | 26                         | 46.2 | 4.23 |
| <a href="http://www.brasileiro.ru/cerrado/images/IMG_0437.JPG.jpg">http://www.brasileiro.ru/cerrado/images/IMG_0437.JPG.jpg</a>                                                                                               | Goiás                             | 36                         | 16.7 | 0.56 |
| <a href="http://www.brasileiro.ru/cerrado/images/IMG_0545.JPG.jpg">http://www.brasileiro.ru/cerrado/images/IMG_0545.JPG.jpg</a>                                                                                               | Goiás                             | 67                         | 6.0  | 0.28 |
| <a href="http://www.brasileiro.ru/cerrado/images/IMG_0566.JPG.jpg">http://www.brasileiro.ru/cerrado/images/IMG_0566.JPG.jpg</a>                                                                                               | Goiás                             | 14                         | 14.3 | 1.11 |
| <a href="http://www.brasileiro.ru/cerrado/images/IMG_0577.JPG.jpg">http://www.brasileiro.ru/cerrado/images/IMG_0577.JPG.jpg</a>                                                                                               | Goiás                             | 35                         | 11.4 | 0.13 |
| <a href="http://blog.kupibilet.ru/strashnie-tainy-planeta-zemlia/">http://blog.kupibilet.ru/strashnie-tainy-planeta-zemlia/</a>                                                                                               | Ilha da Queimada Grande           | 14                         | 21.4 | 0.11 |
| <a href="http://www.brasileiro.ru/piri2/pages/CIMG1477.JPG.htm">http://www.brasileiro.ru/piri2/pages/CIMG1477.JPG.htm</a>                                                                                                     | Near Pirenópolis, Goiás           | 45                         | 35.6 | 2.50 |
| <a href="http://www.brasileiro.ru/piri2/pages/CIMG1482.JPG.htm">http://www.brasileiro.ru/piri2/pages/CIMG1482.JPG.htm</a>                                                                                                     | Near Pirenópolis, Goiás           | 29                         | 13.8 | 1.93 |
| <a href="http://www.brasileiro.ru/piri2/pages/CIMG1495.JPG.htm">http://www.brasileiro.ru/piri2/pages/CIMG1495.JPG.htm</a>                                                                                                     | Near Pirenópolis, Goiás           | 28                         | 3.6  | 0.11 |
| <a href="http://www.brasileiro.ru/chapada/pages/Chapada-dos-Veadeiros-20020.jpg">http://www.brasileiro.ru/chapada/pages/Chapada-dos-Veadeiros-20020.jpg</a>                                                                   | Chapada dos Veadeiros             | 19                         | 15.8 | 0.97 |
| <a href="http://www.brasileiro.ru/chapada/pages/Chapada-dos-Veadeiros-20046.jpg.htm">http://www.brasileiro.ru/chapada/pages/Chapada-dos-Veadeiros-20046.jpg.htm</a>                                                           | Chapada dos Veadeiros             | 18                         | 0    | 0    |
| <a href="http://www.brasileiro.ru/pirenopolis/pages/IMG_1253.JPG.htm">http://www.brasileiro.ru/pirenopolis/pages/IMG_1253.JPG.htm</a>                                                                                         | Near Pirenópolis, Goiás           | 13                         | 0    | 0    |
| <a href="http://www.brasileiro.ru/pirenopolis/pages/IMG_1321.JPG.htm">http://www.brasileiro.ru/pirenopolis/pages/IMG_1321.JPG.htm</a>                                                                                         | Near Pirenópolis, Goiás           | 21                         | 42.9 | 1.02 |
| <a href="http://www.brasileiro.ru/pir/pages/Picture_20011.jpg.htm">http://www.brasileiro.ru/pir/pages/Picture_20011.jpg.htm</a>                                                                                               | Near Pirenópolis, Goiás           | 12                         | 50.0 | 1.67 |
| <a href="http://forum.awd.ru/gallery/images/upload/675/71f/67571f1b1a34412fca9111aced1a747a.jpg">http://forum.awd.ru/gallery/images/upload/675/71f/67571f1b1a34412fca9111aced1a747a.jpg</a>                                   | Lençóis Maranhenses National Park | 12                         | 16.7 | 0.08 |
| <a href="http://sabibon.info/6063-lesa-amazonki-foto.html">http://sabibon.info/6063-lesa-amazonki-foto.html</a> (Amazonas25)                                                                                                  | Unknown (Amazon basin)            | 17                         | 11.8 | 0.35 |
| <a href="http://sabibon.info/6063-lesa-amazonki-foto.html">http://sabibon.info/6063-lesa-amazonki-foto.html</a> (Amazonas15)                                                                                                  | Unknown (Amazon basin)            | 17                         | 11.8 | 0.20 |
| <a href="http://zastavok.ru/priroda/leto/308-lesa_brazilii.html">http://zastavok.ru/priroda/leto/308-lesa_brazilii.html</a>                                                                                                   | Unknown                           | 17                         | 0    | 0    |
| <a href="http://images.sciencedaily.com/2014/08/140828142656-large.jpg">http://images.sciencedaily.com/2014/08/140828142656-large.jpg</a>                                                                                     | Unknown (Atlantic coast)          | 21                         | 19.0 | 0.90 |
| <a href="http://jwblackboard.com/amazon-rainforest-animals-and-plants-facts-218.jpg">http://jwblackboard.com/amazon-rainforest-animals-and-plants-facts-218.jpg</a>                                                           | Unknown (Amazon basin)            | 18                         | 0    | 0    |

<sup>1</sup> Mean values based on three independent measurements (see text for details). n, number of leaves; dam, proportion of leaves damaged by defoliating insects (%); cons, proportion of leaf area consumed by defoliating insects (%).

|                                                                                                                                                                                                                                                                           |                        |    |      |      |
|---------------------------------------------------------------------------------------------------------------------------------------------------------------------------------------------------------------------------------------------------------------------------|------------------------|----|------|------|
| <a href="http://2.bp.blogspot.com/-dUK5UyW34Lo/Uwe_zRMMv9I/AAAAAAAAAGc/NOImDI95g1M/s1600/Amazon+Rainforest+Animals+-+Spider+Monkey.jpg">http://2.bp.blogspot.com/-dUK5UyW34Lo/Uwe_zRMMv9I/AAAAAAAAAGc/NOImDI95g1M/s1600/Amazon+Rainforest+Animals+-+Spider+Monkey.jpg</a> | Unknown (Amazon basin) | 28 | 0    | 0    |
| <a href="http://www.fotothing.com/LuisBacher/photo/9a269957eaf01d56596979d1f09d6c71/">http://www.fotothing.com/LuisBacher/photo/9a269957eaf01d56596979d1f09d6c71/</a>                                                                                                     | Unknown <sup>2</sup>   | 31 | 12.9 | 0.15 |
| <a href="https://sunergoscoffee.com/wordpress/wp-content/uploads/wpsc/product_images/Brazil-tree-in-flower.JPG">https://sunergoscoffee.com/wordpress/wp-content/uploads/wpsc/product_images/Brazil-tree-in-flower.JPG</a>                                                 | Unknown                | 49 | 8.2  | 0.09 |
| <a href="http://www.mirkrasiv.ru/nature/zhabotikaba-ili-dzhabotikaba-lat-myrciaria-caulifloria-brazilskoe-vinogradnoe-derevo.html">http://www.mirkrasiv.ru/nature/zhabotikaba-ili-dzhabotikaba-lat-myrciaria-caulifloria-brazilskoe-vinogradnoe-derevo.html</a>           | Unknown <sup>3</sup>   | 16 | 0    | 0    |
| <a href="http://photo.qip.ru/users/demavi/150912930/166620723/">http://photo.qip.ru/users/demavi/150912930/166620723/</a>                                                                                                                                                 | Unknown (Amazon basin) | 26 | 42.3 | 0.69 |

---

<sup>2</sup> Plant name: *Lophantera lactescens*.

<sup>3</sup> Plant name: *Myrciaria cauliflora*.
